1 Running Head: RAPID ADAPTIVE RADIATION OF HELICONIUS

2

3 Title: Multilocus Species Trees Show the Recent Adaptive Radiation of the Mimetic *Heliconius*

4 Butterflies

5

6 Krzysztof M. Kozak<sup>1\*</sup>, Niklas Wahlberg<sup>2</sup>, Andrew Neild<sup>3</sup>, Kanchon K. Dasmahapatra<sup>4</sup>, James

7 Mallet<sup>5</sup>, Chris D. Jiggins<sup>1,6</sup>

8 <sup>1</sup>*Butterfly Genetics Group, Department of Zoology, University of Cambridge, CB2 3EJ Cambridge*

9 *UK*

10 <sup>2</sup>*Laboratory of Genetics, Department of Biology, University of Turku, 20014 Turku, Finland*

11 <sup>3</sup>*Nr 8 Old Park Ridings, Grange Road, London N21 2EU, UK*

12 <sup>4</sup>*Department of Biology, University of York, YO10 5DD Heslington, York, UK*

13 <sup>5</sup>*Department of Organismic and Evolutionary Biology, Harvard University, Cambridge, MA*

14 *02138, USA*

15 <sup>6</sup>*Smithsonian Tropical Research Institute, Panama City, Panama*

16 *\*Corresponding author: kk443@cam.ac.uk, Phone: 00441223336644*

17

18

19

20

21

22

23

## 24 ABSTRACT

25 Müllerian mimicry among Neotropical Heliconiini butterflies is an excellent example of natural  
 26 selection, and is associated with the diversification of a large continental-scale radiation. Some of  
 27 the processes driving the evolution of mimicry rings are likely to generate incongruent phylogenetic  
 28 signals across the assemblage, and thus pose a challenge for systematics. We use a dataset of 22  
 29 mitochondrial and nuclear markers from 92% of species in the tribe to re-examine the phylogeny of  
 30 Heliconiini with both supermatrix and multi-species coalescent approaches, characterise the  
 31 patterns of conflicting signal and compare the performance of various methodological approaches to  
 32 reflect the heterogeneity across the data. Despite the large extent of reticulate signal and strong  
 33 conflict between markers, nearly identical topologies are consistently recovered by most of the  
 34 analyses, although the supermatrix approach fails to reflect the underlying variation in the history of  
 35 individual loci. The first comprehensive, time-calibrated phylogeny of this group is used to test the  
 36 hypotheses of a diversification rate increase driven by the dramatic environmental changes in the  
 37 Amazonia over the past 23 million years, or changes caused by diversity-dependent effects on the  
 38 rate of diversification. We find that the tribe Heliconiini had doubled its rate of speciation around  
 39 11 Ma and that the presently most speciose genus *Heliconius* started diversifying rapidly at 10 Ma,  
 40 likely in response to the recent drastic changes in topography of the region. Our study provides  
 41 comprehensive evidence for a rapid adaptive radiation among an important insect radiation in the  
 42 most biodiverse region of the planet.

43

44 Keywords: multispecies coalescent, speciation rate, incongruence, mimicry, Lepidoptera,

45 Amazonia, Miocene

46

47

48

49

Visual mimicry provides an excellent system in which to study the origins of biodiversity, as the targets of selection are clearly identifiable and the role of natural selection in promoting adaptation and ultimately speciation can be directly observed (Bates 1863; Benson 1972; Mallet and Barton 1989; Sherratt 2008; Pfennig 2012). Studies of mimetic assemblages have been instrumental in explaining many biological phenomena, ranging from reproductive isolation (McMillan et al. 1997; Jiggins et al. 2001; Merrill et al. 2012) to genetics of adaptation (Benitez-Vieyra et al. 2007; Baxter et al. 2009; Jones et al. 2012), and including prominent examples from vertebrates (Brodie III and Brodie Jr 2004, Wright 2011), arthropods (Ceccarelli and Crozier 2007, Janzen et al. 2010, Hines and Williams 2012), plants (Benitez-Vieyra et al. 2007), and microbes (Elde and Malik 2009).

Testing hypotheses regarding the evolution of mimicry depends heavily on our knowledge of systematic relationships between the participating taxa, particularly where mimics are closely related. Phylogenetic comparative approaches have been used to address questions such as concerted coevolution of Müllerian co-mimics in catfish (Wright 2011), advergence due to directional selection in Batesian mimicry of spiders (Ceccarelli and Crozier 2007) and selection on imperfect mimics among the hoverflies (Penney et al. 2012). Unfortunately, both hybridisation driven by strong selection on adaptive loci and rapid radiation leading to incomplete lineage sorting are likely to be common in mimetic systems (Savage and Mullen 2009; Kubatko and Meng 2010; Kunte et al. 2011; Zhang et al. 2013) and can significantly interfere with the estimation of phylogenies (Maddison and Knowles 2006; Linnen and Farrell 2008; Edwards 2009; Anderson et al. 2012).

We use the Neotropical butterfly tribe Heliconiini (Nymphalidae: Heliconiinae) to explore the problem of phylogeny estimation in a Müllerian mimetic group and investigate the link between the dynamics of speciation and macroevolutionary factors. Heliconiini are arguably the most thoroughly-researched example of microevolution in the Neotropics, the most biodiverse region of the world (Hoorn et al. 2010). They comprise the genus *Heliconius* and nine smaller genera,

76 providing a spectacular example of a radiation where speciation is frequently caused by mimicry of  
 77 aposematic patterns directed against avian predators (Jiggins et al. 2001; Arias et al. 2008; Merrill  
 78 et al. 2012). The system has provided an excellent example for the study of convergence from both  
 79 genomic and organismal perspective (e. g. Duenez-Guzman et al. 2009; Hines et al. 2011; Bybee et  
 80 al. 2012; Heliconius Genome Consortium 2012; Martin et al. 2012, 2013; Pardo-Díaz et al. 2012;  
 81 Jones et al. 2013; Nadeau et al. 2013; Supple et al. 2013). The clade presents an opportunity for  
 82 comparative studies of many unique traits, including larval and imaginal sociality (Beltrán et al.  
 83 2007), pupal mating (Estrada et al. 2011), pollen feeding (Cardoso and Gilbert 2013), or close  
 84 association with varying numbers of Passifloraceae host plants (Brown 1981; Merrill et al. 2013).  
 85 The ongoing proliferation of comparative molecular and genomic studies on the diversity of genes  
 86 regulating vision (Pohl et al. 2009), chemosensation (Briscoe et al. 2013) and cyanogenesis  
 87 (Chauhan et al. 2013) makes a stable molecular phylogeny especially desirable.

88         An unusual feature of *Heliconius* is the prevalence and importance of gene flow and  
 89 hybridisation, leading to a controversy over the validity of traditional species concepts in the clade  
 90 (Beltrán et al. 2002; Mallet et al. 2007). At least 26% of all species of Heliconiini occasionally  
 91 produce hybrids in the wild (Mallet et al. 2007), and *H. heurippa* has resulted from homoploid  
 92 hybrid speciation from parental forms diverged millions of years ago (Mavárez et al. 2006; Jiggins  
 93 et al. 2008; Salazar et al. 2010). Genome sequencing has shown that mimetic diversity in the *H.*  
 94 *melpomene* and silvaniform clades is also explained by adaptive introgression of genes regulating  
 95 the aposematic wing patterns (Heliconius Genome Consortium 2012; Pardo-Díaz et al. 2012), and  
 96 seemingly neutral gene flow is widespread, influencing as much as 40% of the genome between *H.*  
 97 *melpomene* and *H. cydno* (Martin et al. 2013).

98         A large body of recent work has been devoted to the issue of incongruence between the  
 99 species tree (the true speciation history) and the gene trees evolving within (Anderson et al. 2012;  
 100 Cutter 2013). The traditional approach of concatenating the total genetic evidence into a  
 101 supermatrix in order to obtain a global estimate of the predominant phylogenetic signal and hidden

support (Gatesy and Baker 2005), without consideration for the heterogeneity of individual partitions, has been to some extent superseded by multispecies coalescent (MSC) techniques (reviewed in: Edwards 2009; Knowles and Kubatko 2010; Anderson et al. 2012; Cutter 2013; Leaché et al. 2013). The majority of the new MSC algorithms are intended to model at least some of the sources of heterogeneity between different markers, most frequently focusing on the problem of incomplete lineage sorting (e.g. Maddison and Knowles 2006; Heled and Drummond 2010), sometimes addressing hybridisation (e.g. Gerard et al. 2011; Yu et al. 2011), and in at least one case modelling discordance without specifying its potential source (Larget et al. 2010). Although the supermatrix approach remains popular and serves as an effective approximation of the species diversification history in most cases, its ability to properly assess the degree of statistical support for phylogenies has been brought into question and contrasted with the potential of the MSC techniques to assess confidence more realistically (Edwards 2009; Knowles and Kubatko 2010). Heliconiini are an especially interesting subject for a systematic study, where the purported robustness of MSC tools to gene flow and other sources of incongruence can be tested with real data and used to evaluate support in the light of underlying heterogeneity of the phylogenetic signal.

Heliconiini systematics has a long history, starting with early morphological work (Emsley 1965; Brown 1981; Penz 1999), through allozymes (Turner et al. 1979) and a combination of morphological and RNA-restriction data (Lee et al. 1992), to studies based on the sequences of mitochondrial and nuclear markers (Brower 1994b; Brower and Egan 1997; Beltrán et al. 2002, 2007; Cuthill and Charleston 2012). The most comprehensive study to date by Beltrán et al. (2007) attempted to address some of the difficulties by incorporating many taxa (38 of 46 *Heliconius*, 59 of 78 Heliconiini), considering two individuals of most species, and sequencing two mitochondrial (*CoI/II*, *16S*) and four nuclear markers (*EF1a*, *Wg*, *Ap*, *Dpp*). However, this dataset is still potentially inadequate to address the challenges posed by Heliconiini systematics, as three of the loci (*16S*, *Ap*, *Dpp*) were only sequenced for 12 representative species. Among the other three markers, 65% of the variable sites resided in the fast-evolving mitochondrial partition *CoI/II*,

raising the possibility that the inferred relations are largely driven by the historical signal of the matriline. The proposed relationships between the basal genera of the tribe were poorly supported and the relationships between *Heliconius*, *Eueides* and the other eight genera was not resolved, as might be expected if most of the data comes from a fast-evolving partition. Importantly, the individual data partitions were analysed in concatenation, as the debate on the species tree-gene tree incongruence was in its early stages at the time. Despite these shortcomings, Beltrán and colleagues confirmed that the morphological and behavioural characteristics of the major clades do not correspond directly to their evolutionary history and that the traditionally recognised genera *Laparus* and *Neruda* are most likely nested within the crown genus *Heliconius*.

The importance of Müllerian mimicry as a driver of individual speciation events has been well-established (Mallet et al. 1998; Mallet and Joron 1999; Jiggins 2008) whereas the macroevolutionary processes governing the evolution of the group have been largely neglected in empirical studies (but see Etienne et al. 2012; Rosser et al. 2012). Precise understanding of the evolution of the Müllerian mimicry rings as well as associated processes such as hybridisation, requires knowledge of the relative timing of the divergence events and motivated the most widely-cited study of the molecular clock in Arthropoda (Brower 1994a). Mallet et al. (2007) used a relaxed clock procedure to adjust the original branch lengths based on the *CoI/II* alignment. However, some of the relations were left unresolved, and the sequences were not partitioned into fast and slow-evolving codon positions, which can result in inflated age estimates (Brandley et al. 2011).

Most importantly, the first dated phylogeny of Heliconiini is not calibrated to an absolute standard, making it impossible to make inferences about the relation of the diversification process and the contemporaneous geological and climatic events. The cumulative results of over 200 systematic studies demonstrate that most South American tropical clades have experienced periods of significantly elevated net diversification rate in response to Andean orogenesis, alterations in the hydrology and sediment dynamics of the present-day Amazon Basin, as well as local and global

climatic changes (Hoorn et al. 2010; Turchetto-Zolet et al. 2013). These processes can result in allopatry of incipient lineages, or in creation of new ecological niches and change to the species-level carrying capacity of the environment leading to ecological speciation (Brumfield and Edwards 2007; Hoorn et al. 2010). A recent comparative study suggests that the majority of *Heliconius* lineages originated in the North-Eastern Andes and spread to other parts of the continent (Rosser et al. 2012). Three periods stand out as potentially critical in the history of Heliconiini as the times when orogenic, hydrologic and climatic events would have created new habitats and altitudinal gradients. The first phase of the intense Andean uplift, taking place 23 Ma, was also the start of the great marine incursion into the North of the continent, separating the incipient mountain range from the Eastern plateaus (Gregory-Wodzicki 2000; Solomon et al. 2008; Hoorn et al. 2010). 12.4 Ma marked the end of the Mid-Miocene Climatic Optimum and the onset of global cooling (Lewis et al. 2007), which likely led to the reduction and separation of the rainforest areas by savannas unsuitable for many Heliconiini (Jaramillo et al. 2011). Coincident was the second stage of rapid Andean orogeny 12 Ma, strongly changing the elevation gradients in the Central and Eastern sectors (Gregory-Wodzicki 2000), and followed shortly by the entrenchment of the Amazon in its modern course 10 Ma, and a gradual expansion of the rainforest in place of the retreating wetlands during the next 3 Myr (Hall and Harvey 2002, Figueiredo 2009, Hoorn 2010). Finally, the Eastern Colombian Cordillera uplifted in the last burst 4.5 Ma and the Isthmus of Panama connected at least 3 Ma, possibly changing the patterns of isolation between various populations (Hill et al. 2013). Hence we can hypothesise that the diversification rate of Heliconiini increased during the periods of intensive Andean uplift around 23, 12 and 4.5 Ma.

# *Aims of the Study*

Here we aim to resolve the species tree of the Heliconiini radiation and generate a dataset including virtually all of the currently valid species in the tribe, sampling intraspecific diversity across the range of many of the species. We include information from 20 nuclear and two

180 mitochondrial markers, as well as the whole mitochondrial sequence of select species. The exonic  
 181 markers comprise both autosomal and Z-linked loci, chosen to represent a sampling of  
 182 chromosomes and a range of evolutionary rates, from fast-evolving mitochondrial genes (e.g.  
 183 *Col/II*) to more slow evolving nuclear loci (e.g. *Wg*). We apply a wide range of phylogenetic  
 184 methods to reconstruct the species tree, including supermatrix, coalescent and network approaches,  
 185 which allow us to assess the strength of the underlying signal of speciation. The power of our  
 186 combined approach is harnessed to detect the incongruence between markers, likely to arise from  
 187 the complex population-level processes acting in a radiation of Müllerian co-mimics. We elucidate  
 188 the importance of marker heterogeneity for the final assessment of systematic relationships, while  
 189 realistically estimating the support values for our chosen topology. A robust estimate of the  
 190 relationships between 92% of the species and multiple outgroups makes it possible to date the time  
 191 of individual divergence events with confidence, providing input for an analysis of diversification  
 192 dynamics. The calibrated chronogram is used to test our hypothesis of diversification rate increase  
 193 at times of dramatic environmental changes in the Andes and Amazonia, as well as the previous  
 194 suggestions of diversity-dependent cladogenesis in Heliconiini (Fordyce 2010; Etienne et al. 2012).  
 195 We thus present a comprehensive study of macroevolutionary dynamics in a mimetic system that  
 196 has been studied intensively at the microevolutionary level.

197



## 198 MATERIALS AND METHODS

199

### 200 *Taxon Sampling*

201 We sampled 180 individuals, including 71 of the 78 species in all genera of Heliconiini and  
 202 11 outgroup species. The specimens came primarily from our collection at the University of  
 203 Cambridge, with additional specimens shared by museums and private collectors (Online Appendix  
 204 1). We included five outgroup species from the sister tribe Acraeini (Wahlberg et al. 2009) and  
 205 three from the related genus *Cethosia*. The diverse analyses used in this paper require different  
 206 sampling designs and the demands of all the techniques cannot be easily accommodated in a single  
 207 dataset. For example, the network analysis based on nucleotide distance produced much better  
 208 supported and resolved trees when the 95% or more incomplete data from historical specimens were  
 209 not used, whereas the various multi-species coalescent techniques required the use of at least two  
 210 individuals per species and had to be based only on taxa with intraspecific sampling (Fulton and  
 211 Strobeck 2009; Heled and Drummond 2010). Thus we distinguish four datasets. The complete data  
 212 matrix includes all the data. The core dataset excludes 14 individuals represented solely by short  
 213 DNA fragments from historical specimens. The single-individual dataset includes both modern and  
 214 historical specimens, but with only the single best-sequenced individual per taxon. Finally, the  
 215 \*BEAST matrix contains only the 17 species of *Eueides* and *Heliconius* with extensive sampling of  
 216 multiple representatives of each species.

217

### 218 *DNA Sequencing*

219 We used 20 nuclear and two mitochondrial loci as markers (Table 1; Online Appendix 1),  
 220 exceeding the number of loci considered sufficient for most phylogenetic problems (Gatesy et al.  
 221 2007). The selection includes the three classic molecular markers for Lepidoptera (*Col/II*, *EF1a*,  
 222 *Wg*), two markers proposed by Beltrán et al. (2007) (*I6S*, *Dpp*), eight new universal markers  
 223 proposed by Wahlberg and Wheat (2008) (*ArgK*, *Cad*, *Cmdh*, *Ddc*, *Idh*, *Gapdh*, *Rps2*, *Rps5*) and

224 nine highly variable loci identified by Salazar et al. (2010) (*Aact*, *Cat*, *GlyRS*, *Hcl*, *Hsp40*, *Lm*,  
225 *Tada3*, *Trh*, *Vas*). Additional *Heliconius*-specific primers were designed for *Cmdh*, *Gapdh* and *Idh*.  
226 Details of the primers and PCR cycles are listed in the Online Appendix 2. For most species,  
227 sequences of the three basic markers for multiple individuals were already published (Brower 1997;  
228 Beltrán et al. 2007; Wahlberg et al. 2009; Salazar et al. 2010), and data for 26 individuals came  
229 exclusively from GenBank (Online Appendix 1).

230 We generated Sanger sequences for 103 specimens (Online Appendix 1). DNA was isolated  
231 from approximately 50 µg of thorax tissue using the DNeasy Blood & Tissue kit (Qiagen,  
232 Manchester, UK). PCR was carried out in a total volume of 20 µl, containing 1x Qiagen Taq buffer  
233 (Manchester, UK), 2.5 mM MgCl<sub>2</sub>, 0.5 µM of each primer, 0.2 mM dNTPs, 1 unit bovine serum  
234 albumin, 0.5 unit Qiagen Taq-Polymerase and 1 µl of the DNA extract. The following program was  
235 executed on a G-Storm cycler (Somerton, UK): denaturation 5 minutes at 94°C; 35 cycles of 30  
236 seconds at 94°C, 30 seconds at the annealing temperature and 90 seconds at 72°C; final extension  
237 for 10 minutes at 72°C. The results were visualised by electrophoresis in 1.5% agarose gel stained  
238 with 1% ethidium bromide. PCR products were cleaned using the ExoSAP-IT system (USB,  
239 Cleveland, Ohio): 60 minutes at 37°C; 20 minutes at 80°C. We used gel purification with the  
240 Nucleo Spin Extract II kit (Macherey-Nagel, Dueren, Germany) as needed. Sanger sequencing  
241 reaction was carried out with the BigDye Terminator v. 3.1 (AB, Foster City, California: 2 minutes  
242 at 94°C; 25 cycles of 10 seconds at 94°C, five seconds at 50°C and four minutes at 60°C. The  
243 products were sequenced with the ABI 3730xl DNA Analyzer at the Sequencing Facility,  
244 Department of Biochemistry, University of Cambridge. We manually inspected the traces in  
245 CodonCode v. 4.0.4 using PHRED for quality assessment (CodonCode Corporation 2012).

246 At the time of our Sanger sequencing effort, whole genome data generated for other studies  
247 became available from 57 individuals in 27 common species (*Heliconius* Genome Consortium  
248 2012; Briscoe et al. 2013; Supple et al. 2013; Dasmahapatra and Mallet, unpublished) (Online  
249 Appendix 1). 100 base pair reads were generated using the Illumina Genome Analyzer II and HiSeq

250 2000 platforms with insert size of 300-400 bp. We performed *de novo* assembly of the short reads  
 251 in the program Abyss v. 1.3 (Simpson et al. 2009). Based on previous studies (Salzberg et al. 2012;  
 252 Briscoe et al. 2013) and preliminary results (S. Baxter, *pers. comm.*), we chose k-mer length of 31,  
 253 minimum number of pairs n=5 and minimum mean coverage c=2 as optimal settings. The 20  
 254 nuclear markers were mined from the assemblies by megaBLAST (Camacho et al. 2009) in  
 255 Geneious v. 5.5.1 (Biomatters Ltd 2012) using reference sequences from the *Heliconius melpomene*  
 256 genome. The quality of the recovered sequences was assessed by alignment to previously generated  
 257 amplicon sequences of the same loci from the same individuals.

258 Mitochondrial sequences could not be recovered by *de novo* methods, presumably because the  
 259 large number of reads from the highly abundant mitochondrial DNA contained a high enough  
 260 number of erroneous sequences to interfere with the assembly. We reconstructed whole  
 261 mitochondrial genomes of 27 species by mapping to the *Heliconius melpomene* reference (The  
 262 *Heliconius* Genome Consortium, 2012), using the default settings in the Genomics Workbench v.  
 263 5.5.1 (CLCBio 2012). This data was analysed separately from the 21 locus mixed nuclear-  
 264 mitochondrial alignment. All the original sequences were deposited in GenBank (Accession  
 265 numbers – data in submission; Online Appendix 1).

266

# 267 *DNA Sequencing: Historical Specimens*

268 Short fragments of *CoI/III* and *EFl $\alpha$*  were sequenced from historical specimens up to 150  
 269 years of age, obtained from museum and private collections (Online Appendix 1) and processed in a  
 270 vertebrate genetics laboratory to reduce the risk of contamination. Instruments and surfaces were  
 271 cleaned with 5% bleach and irradiated with UV for 30 minutes prior to use. One to two legs were  
 272 washed in water, immersed in liquid nitrogen in a test tube for 30 seconds and ground up, followed  
 273 by an extraction into 20  $\mu$ l of buffer using the QIAmp DNA Micro Kit (Qiagen, Manchester, UK).  
 274 We treated every fifth extraction and every fifth PCR as a negative control with no tissue or DNA  
 275 extract. PCR reactions were carried out in a 20  $\mu$ l volume using 1 unit of Platinum HiFi Taq

276 Polymerase (Invitrogen, London, UK) and 1x buffer, 2.5 mM MgCl<sub>2</sub>, 0.5 µM of each primer, 0.2  
277 mM dNTPs, 1 unit bovine serum albumin, sterilised DNase-free water and 1-5 µl of the DNA  
278 extract depending on concentration. In order to accommodate shearing of DNA with time, we  
279 designed and applied PCR primers spanning short fragments of 200-300 bp (Online Appendix 2).  
280 We carried out amplification, product clean up and sequencing as above, partially accounting for  
281 possible cross-contamination by blasting the results against GenBank.

282

# 283 *Alignment and Gene Tree Estimation*

284 Alignments for each locus were generated in CodonCode v. 3 to account for inverted and  
285 complemented sequences, and improved using MUSCLE v. 3.8 (Edgar 2004). We visualised the  
286 alignments of the coding loci (all except the mitochondrial *16S* and the *tRNA-Leu* fragment in the  
287 *Col/II* sequence) in Mesquite v. 2.75 (Maddison and Maddison 2011) and checked translated  
288 sequences for stop codons indicating errors. The whole mitochondrial sequences were aligned to the  
289 *Acraea issoria* and *Heliconius melpomene* references (*Heliconius* Genome Consortium 2012) using  
290 the G-INS-i algorithm in MAFFT (Katoh 2002). The number of variable and parsimony informative  
291 sites was estimated for each locus in PAUP\* v. 4 (Swofford 2002). Models of sequence evolution  
292 implemented in MrBayes (Ronquist and Huelsenbeck 2003) and BEAST (Drummond and Rambaut  
293 2007) were selected in MrModelTest v. 2.3 (Posada and Crandall 1998; Nylander 2004) based on  
294 the Akaike's AIC (Akaike 1974). Xia's test in DAMBE v. 4.0 (Xia and Xie 2001) demonstrated  
295 saturation in the third codon position of *Col/II*. Protein-coding mitochondrial markers often display  
296 high saturation at the third codon position, potentially leading to incorrect parametrisation of  
297 substitution rate models (Brandley et al. 2011). To account for this effect, in all the subsequent  
298 analyses we treated the third codon position of the fast-evolving *Col/II* locus as a separate partition.  
299 The Leucine tRNA (*tRNA-Leu*) fragment occurring in the middle of *Col/II* displays very low  
300 variability and thus was included in one partition with the slower evolving first and second codon  
301 positions. Individual gene trees were estimated in MrBayes v. 3.1, using four runs of one chain, 10

million MCMC cycles sampled every 1000 cycles, and 2.5 million cycles discarded as burnin based on the convergence diagnostic. The mitochondrial genes were concatenated due to their shared history, but treated as separate partitions with distinct models. All trees were visualised with FigTree v. 1.4 (Rambaut 2009).

### *Detection of Conflicting Signals*

We investigated the cyto-nuclear discordance and other conflicts in the phylogenetic signal with several methods. To illustrate the global reticulate signal in the data, a NeighborNet network was built in the program SplitsTree v. 4 (Kloepper and Huson 2008) with the pairwise distances calculated under the F84 correction for multiple hits. We reduced the dataset to a single best-sequenced individual per species in order to exclude the reticulations resulting from the expected recombination within species. Next, the topological disparity among individual loci was illustrated using Multi-Dimensional Scaling of pairwise Robinson-Foulds distance (Robinson and Foulds 1981) between the gene trees, as estimated by TreeSetViz v. 1.0 (Hillis et al. 2005) in Mesquite. Calculation of the RF required trimming the trees to the minimal set of 54 shared taxa from 27 species, using the R package APE (Paradis et al. 2004; R Development Core Team 2008). Finally, we investigated if topologies and branch lengths of the individual loci are consistent enough to be concatenated, by means of a hierarchical likelihood ratio test in Concaterpillar v. 1.5 (Leigh et al. 2008).

### *Supermatrix Phylogenetics*

We created a supermatrix of the 20 nuclear and 2 mitochondrial markers in Mesquite and estimated the Maximum Likelihood (ML) phylogeny under the GTRGAMMA model in RAxML v. 7.0.4, with 1000 bootstrap replicates under the GTRCAT approximation (Stamatakis 2006). To explicitly test the likelihood of various hypotheses for Heliconiini phylogeny, several alternative topologies were created in Mesquite, representing previously identified groupings, as well as

suggested placements of the enigmatic genera *Cethosia*, *Laparus* and *Neruda* (Beltrán et al. 2007, Brower 1994, Brower & Egan 1997, Mallet et al. 2007, Penz 1999, Penz & Peggie 2003). We then re-estimated the ML tree under the GTRGAMMA model using each topology as a constraint. The likelihood scores of the original and alternative trees were compared using the Shimodaira-Hasegawa test (Shimodaira and Hasegawa 1989) and the Expected Likelihood Weights based on 1000 bootstrap replicates (Strimmer and Rambaut 2002). A separate phylogeny was generated for the unpartitioned whole mitochondrial alignment in RAxML under the GTRGAMMA model with 1000 bootstrap replicates.

We estimated a calibrated Bayesian phylogeny using the program BEAST v. 1.7.5 (Drummond et al. 2006). In order to avoid incorrect estimates of the substitution rate parameters resulting from the inclusion of multiple samples per species, this analysis was based on a pruned alignment with one individual per species. The only exception is the inclusion of 3 races of *H. melpomene* and 2 races of *H. erato*, where deep geographical divergences are found (Quek et al. 2010). The Vagrantini sequences were not used, as BEAST can estimate the placement of the root without an outgroup (Drummond et al. 2006). Thus the analysis included 78 taxa and the substitution rate models were re-estimated appropriately (Table 1). We linked the topology, but modelled an uncorrelated lognormal clock and the substitution rate separately for each locus (Drummond et al. 2006). Substitution rates were drawn from the overdispersed gamma distribution prior with shape parameter  $k=0.001$ , scale parameter  $\theta=1$  and starting value 0.001 for nuclear genes, and  $k=0.01$  for the faster-evolving mitochondrial loci (van Velzen 2013). We used a Birth-Death tree prior and empirical base frequencies to limit the computation time for the heavily parametrised model. As no fossils of Heliconiini or closely related tribes are known, we used a secondary calibration point from the dated phylogeny of Nymphalidae (Wahlberg et al. 2009; van Velzen et al. 2013). The age of the root was modelled as normally distributed with a mean of 47 Ma and a standard deviation of 3.0 Ma, corresponding to the 95% confidence intervals of the Acraeini-Heliconiini split found by Wahlberg et al. (2009). Four independent instances of the MCMC chain

were ran for 100 million cycles each, sampling the posterior every 10000 cycles and discarding 10 million cycles as burnin. The input .xml file generated in BEAUti v. 1.7.5 (Drummond et al. 2010) can be found in the Online Appendix 3. To ensure that the results are driven by the data and not the priors, we executed a single empty prior run. Convergence of the continuous parameters was evaluated in Tracer v. 1.4, and the Maximum Clade Credibility tree with mean age of the nodes was generated using LogCombiner v. 1.7.5 and TreeAnalyser v. 1.7.5 (Rambaut and Drummond 2010).

### *Multispecies Coalescent Phylogenetics*

To account for the heterogeneous phylogenetic signal resulting from gene flow, hybridisation and incomplete lineage sorting, we applied a variety of multispecies coalescent (MSC) analyses that take as input both the raw alignment and individual gene trees). We first used the established method of minimising deep coalescences (MDC) (Maddison and Knowles 2006), taking advantage of a dynamic programming implementation in the package PhyloNet (Than et al. 2008). 100 bootstrap input files containing 100 trees were drawn randomly without replacement from the distribution of Bayesian gene trees for the 21 loci, an MDC phylogeny was estimated for each input and a 50% majority rule consensus was taken.

Bayesian Concordance Analysis (BCA) is an MSC method that attempts to reconcile the genealogies of individual loci based on posterior distributions, regardless of the sources of conflict (Larget et al. 2010). BCA generates Concordance Factors (CFs), which show what proportion of loci contain a particular clade, and estimates the primary phylogenetic hypothesis from the best-supported clades. CFs offer a powerful alternative to traditional measures of support and can be conveniently estimated in the program BUCKy (Ané et al. 2007; Larget et al. 2010). We executed two runs of one million MCMC cycles in BUCKy based on the 21 posterior distributions of gene trees from MrBayes.

Another approach to the multispecies coalescent is to estimate the gene trees and the species tree simultaneously, explicitly modelling the sources of incongruence (Edwards et al. 2007). We



380 applied this technique using \*BEAST, a program harnessing the power of BEAST and  
 381 simultaneously implementing a powerful MSC algorithm that estimates the species tree and the  
 382 embedded gene trees, as well as the population sizes of the lineages (Heled & Drummond 2010).  
 383 Effective calculation of the population size parameters requires a thorough multilocus sampling of  
 384 each species in the analysis, which forced us to reduce the dataset to species with a minimum of  
 385 three individuals from at least two distinct populations (the \*BEAST dataset). The final alignment  
 386 included 87 terminal taxa in 17 species of *Eueides* and *Heliconius*. We re-estimated the individual  
 387 substitution models for each partition, used a constant population size coalescent tree model and  
 388 implemented other priors as described above for BEAST. We carried out four independent runs of  
 389 500 million cycles each, sampling every 10000 cycles, generated a maximum clade credibility  
 390 species tree and visually summarised the 21 gene trees by plotting in DensiTree (Bouckaert 2010).  
 391 Online Appendix 4 contains the .xml file for this analysis.

392       Sequence alignments and phylogenetic trees were deposited in TreeBase  
 393 (<http://purl.org/phylo/treebase/phyloids/study/TB2:S15531>).

# 395 *Changes in the Diversification Rate*

396       The formal analyses of diversification dynamics were based on the output of the Bayesian  
 397 supermatrix analysis in BEAST and conducted in R. Errors in divergence time estimates are not  
 398 expected to affect the divergence rate calculations significantly (Wertheim and Sanderson 2011),  
 399 and the semi-log lineage through time plots (LTT) of 200 randomly selected posterior trees formed  
 400 a narrow distribution around the maximum clade credibility (MCC) tree with mean node ages.  
 401 Hence we based all the analyses on the MCC tree of Heliconiini with one individual per species,  
 402 excluding outgroups and *Cethosia*.

403       We searched for the signal of change in diversification rate using TurboMEDUSA, which  
 404 identifies shifts *a posteriori* through stepwise AIC (Alfaro et al. 2009). We wanted to investigate  
 405 whether the Heliconiini have undergone significantly faster diversification during the periods of



dramatic environmental change at either 12 or 4.5 Ma, whether the diversification rate of Heliconiini decreased with time due to limiting species density effects (Fordyce 2010; Etienne et al. 2012b), or increased as new lineages evolved novel colour patterns and drove positive mimetic interactions that reduce competition (Elias et al. 2009). To compare these possibilities explicitly, we fitted maximum likelihood models of increasing complexity to the MCC tree, accounting for the uncertainty in the estimates of recent speciation (protracted speciation) and extinction rates (pull of the present) by truncating the phylogeny to 1 Ma before present (Etienne and Haegeman 2012). The following models were fitted and compared using the Akaike weights for all Heliconiini and for *Heliconius* alone: pure birth, with a constant rate or with a shift in rate (PB); birth-death with and without changes in rate (BD); diversity dependent model without extinction (DDL); diversity dependent model with linear terms for speciation or both speciation and extinction (DDE); DDE with rate shifts. We included rate shifts at an unspecified time, at 12 and 4.5 Ma, as well as at 11 and 3.5 Ma to account for possible delayed effects. The likelihood was conditioned on the survival of phylogeny in all runs and it was assumed that there are six species missing for Heliconiini and two for *Heliconius* (Lamas 2004). A possible slowdown in diversification rate after an initial rapid radiation was evaluated by calculating the gamma statistic (Pybus and Harvey 2000) and its significance tested in a Monte Carlo Constant Rates (MCCR) test with 1000 replicates in the package LASER (Rabosky 2006).

## 432 RESULTS

433

### 434 *Sampling and DNA Sequencing*

435 We successfully combined three approaches to sequencing, which resulted in the high  
436 taxonomic coverage and intraspecific sampling necessary for the MSC methods, and a sufficient  
437 sampling of loci for each individual (Online Appendix 1). Most of the dataset consists of Sanger  
438 sequences from 108 individuals, 26 of which were already published in GenBank. We also obtained  
439 two classic lepidopteran markers *Col/II* and *EFlα* from respectively 13 and 11 out of 14 historical  
440 specimens, thus adding eight species of Heliconiini that have not been sequenced previously. We  
441 did not manage to obtain any data from *Philaethria andrei*, *P. browni*, *P. romeroi*, *Eueides emsleyi*,  
442 *E. libitina*, *Heliconius lalitae* or *H. metis* (Lamas 2004; Constantino and Salazar 2010; Moreira and  
443 Mielke 2010).

444 We capitalised on the availability of Illumina data by generating *de novo* assembly contigs for  
445 further 57 individuals. The N50 of the Abyss assemblies ranged from 552 to 1921 bp (average  
446 1206) and all the nuclear markers were successfully recovered by megaBLAST from every  
447 assembly. Whole mitochondrial sequences of the same individuals were recovered by read  
448 mapping, with about a 400 bp stretch of the hypervariable control region (Heliconius Genome  
449 Consortium 2012) incomplete in some sequences. We obtained a depth of coverage over 100x and  
450 high confidence in the base calls due to the high copy number of mtDNA in the tissue. Finally, we  
451 included the sequences extracted from the *Heliconius melpomene* genome, as well as the previously  
452 published mitochondrial sequence of *Acraea issoria* (Heliconius Genome Consortium 2012).

453 The sequence data for 20 nuclear and 2 mitochondrial genes encompass 71 out of 78 (91%)  
454 of the officially recognised species of Heliconiini, including 44 out of 46 species from the focal  
455 genus *Heliconius* (Lamas et al. 2004; Beltrán et al. 2007; Mallet et al. 2007; Constantino and  
456 Salazar 2010). Although the taxonomic validity of some species is contested, we found that the  
457 diversification analysis is robust to altering the number of missing species. Some recognised taxa

diverged very recently, as shown by the BEAST chronogram (Fig. 1) in case of the *Philaethria*  
*diatonica*/*P. neildi*/*P. ostara* complex and the *Heliconius heurippa*/*H. tristero* pair, the latter of  
which could be considered races of *H. timareta* (Nadeau et al. 2013). However, the exact  
relationship between genetic differentiation and taxonomic species identity in the highly variable,  
mimetic Heliconiini remains unclear (e.g. Mérot et al. 2013). Importantly, 36 species are  
represented by multiple individuals, usually from distant populations, allowing for more accurate  
estimation of sequence evolution rates, and detection of species paraphyly. The number of  
individuals represented by each marker ranges from 40% for *Hcl* to 98% for *Col/II*, and only four  
specimens are represented exclusively by mitochondrial DNA (Online Appendix 1).

# *Pervasive Conflict Between the Loci*

Our nuclear markers span 11 out of 21 chromosomes (Table 1; Heliconius Genome  
Consortium, 2012) and have both autosomal and sex chromosome Z-linked inheritance. We  
examined the conflict between individual markers in the entire tribe and in the genus *Heliconius*  
alone, using both gene tree summary methods and approaches utilising the raw sequence  
alignments. The maximum likelihood analysis of the core matrix in Concaterpillar rejected  
concatenation of any of the loci due to significant differences in both topology and substitution rate  
of individual partitions, but the exact nature of the discordance is unclear. A Multi-Dimensional  
Scaling ordination of pairwise RF distances between the gene trees does not reveal clustering by  
chromosome and the separation between many nuclear loci appears much greater than between  
nuclear and mitochondrial trees (Fig. 2). Consistent with this is the fact that the whole  
mitochondrial phylogeny of select taxa (Fig. 3) shows few differences from the tree based on the  
mixed marker supermatrix (Fig. 1), highlighting that cyto-nuclear discordance is not the primary  
source of incongruence in the dataset.

The coalescent approaches reveal the high extent of marker conflict in the *Heliconius* data.  
Gene tree topologies from the explicit Bayesian modelling of incomplete lineage sorting (ILS) in

484 \*BEAST are highly varied, with a particularly high degree of reticulation in the *H.*  
 485 *melpomene/cydnio* and the *H. hecale* (silvaniform) clades, where extensive horizontal gene flow has  
 486 been observed previously (Sup. Fig. S1; Brown 1981; Martin et al. 2013). Another Bayesian  
 487 method, BUCKy, infers the species in the presence of marker incongruence without modelling  
 488 specific reasons for the observed discordance and calculates the Bayesian concordance factors that  
 489 illustrate the proportion of partitions in the dataset that support a particular grouping (Ané et al.  
 490 2007; Baum 2007; Larget et al. 2010). The concordance of the loci for *Heliconius* is strikingly low  
 491 (Fig. 4), although the topology is consistent with the results of other analyses (Fig. 1 and 3, Sup.  
 492 Fig. S2-S6).

493 Further strong evidence of widespread incongruence comes from the NeighborNet network  
 494 characterised by a high delta score of 0.276, which shows that the structure of the data is not  
 495 entirely tree-like (Sup. Fig. S3). This can be partially attributed to the effect of missing data, yet  
 496 even a fit based on the 30 species with little missing data produced a delta score of 0.11, proving a  
 497 substantial amount of non-bifurcating signal across the tribe (Holland et al. 2002). The most  
 498 noticeable reticulations are found between nodes linking genera and the major clades of *Heliconius*,  
 499 possibly due to pervasive gene flow during the diversification of the main extant lineages (Sup. Fig.  
 500 S3).

# 501

## 502 *Topological Consistency Across Optimality Criteria*

503 Although no trees are identical, the results from our Bayesian, Maximum Likelihood and  
 504 distance-based network analyses of the supermatrix are very similar (Fig. 1, Sup. Fig. S3, S4). Two  
 505 nodes stand out as unstable. *Cethosia* is variably placed as a sister taxon to either Acraeini (MP,  
 506 ML, NeighborNet) or Heliconiini (Bayesian), despite the reasonably extensive sampling of 11 loci  
 507 for *C. cyane*, while the position of *Podotricha* in relation to *Dryas* and *Dryadula* varies between all  
 508 analyses. Most problematic are relations among the species within *Eueides*, where the position of  
 509 four out of 10 taxa cannot be resolved with good support. The poor resolution for both *Eueides* and

510 *Podotricha* can probably be attributed to insufficient site coverage, which produces high uncertainty  
 511 due to patchily distributed missing data (Wiens and Morrill 2011; Roure et al. 2013). We re-  
 512 estimated the relations of *Eueides* based solely on a core set of 11 genes with coverage for at least  
 513 7/10 species and recovered a much better supported tree (Sup. Fig. S6). We recommend studies  
 514 focusing on *Eueides* use this specific phylogeny, but the exact relations of *E. procula*, *E. lineata*  
 515 and *E. heliconioides* remain unclear.

516 Although our Bayesian maximum clade credibility tree is largely consistent with the  
 517 topology estimated by Beltrán *et al.* (2007), significantly increasing the dataset from 113 to 180  
 518 individuals and five to 21 loci allowed us to resolve many critical nodes. The major differences are  
 519 in the relations of the basal genera, which we infer to form a well-supported grade, with *Eueides* as  
 520 the definitive sister genus of *Heliconius* (Fig. 1). Importantly, we confirm that the enigmatic genera  
 521 *Laparus* and *Neruda* are nested within *Heliconius*, as further supported by ELW and SH tests  
 522 (Table 2), although *Neruda* is closer to the base of the genus than previously estimated. We find  
 523 that the other so called “primitive” (Brown 1981) clade of *Heliconius* consists of two separate  
 524 groups, which are by no means basal to the other taxa, raising questions about the apparently  
 525 unequal rate of morphological evolution in the genus.

526 The maximum likelihood tree is similar to the Bayesian phylogeny, although characterised  
 527 by lower overall support, especially for the nodes linking the genera and subgenera (Sup. Fig. S4).  
 528 The nodes differing between the two trees are also the nodes that cannot be unequivocally  
 529 confirmed by either the SH and the ELW test (Table 2). For instance, the highest posterior  
 530 probability in the ELW test (0.21) is given to a tree placing *H. heurippa* as a sister species to *H.*  
 531 *timareta*, a result recovered in both the Bayesian analysis and a recent genome-wide study (Nadeau  
 532 et al. 2013). Thus we suggest that the Bayesian tree should be preferred as a more accurate picture  
 533 of the phylogenetic relationships, although the ML tree based on the complete dataset is still useful  
 534 to uncover multiple polyphyletic species. Notably, *H. luciana* is nested within *H. elevatus*, and *H.*  
 535 *wallacei* is polyphyletic with respect to *H. astraea*. These results must be interpreted with caution,

536 as the inference relies on poorly covered museum specimens and may be sensitive to long branch  
537 attraction (Wiens and Morrill 2011).

538 Our whole mitochondrial phylogeny is largely consistent with the results of the multilocus  
539 supermatrix analysis and well-supported for 46/57 nodes (Fig. 3), despite the relatively limited  
540 taxonomic coverage of only 29 *Heliconiini* for which short-read data was available. In contrast to  
541 the multilocus dataset, mitochondrial genomes are not very useful for resolving relationships  
542 between major clades within *Heliconius*, as the position of *Neruda*, *xanthocles* and *wallacei* clades  
543 is poorly supported. An important deviation from the predominantly nuclear multilocus phylogeny  
544 is the placement of *H. pachinus* as a sister taxon of *H. timareta*, rather than *H. cydno*. This may  
545 reflect the overall instability resulting from a high extent of reticulation in the  
546 *melpomene/cydno/timareta* assemblage (Heliconius Genome Consortium 2012, Martin et al. 2013,  
547 Mérot et al. 2013). Furthermore, we find a surprising positioning of *H. hermathena* within *H. erato*  
548 (Jiggins et al. 2008), which is also not supported by any of the analyses of the 21 locus matrix. The  
549 mitochondrial tree confirms previous observations of deep biogeographical splits in the widespread,  
550 highly diversified *H. erato* and its co-mimic *H. melpomene* (Brower 1994a). Within *H. melpomene*  
551 we find a well-supported distinction between races found to the West and East of the Andes,  
552 although our data place the individuals from French Guiana with the specimens from the Western  
553 clade, in contrast to a whole-genome phylogeny (Nadeau et al. 2013) (Fig. 1). *H. erato* shows the  
554 opposite pattern in both mitochondrial and nuclear data, whereby the Guianian races form a fully  
555 supported clade in the monophyletic group of taxa from East of the Andes.

556 The variety of multi-species coalescent (MSC) methods that we applied brings a new  
557 perspective to the phylogenetic signals in the *Heliconiini*. Notably, different approaches and  
558 combinations of the data yield highly consistent topologies, although the support for the individual  
559 nodes varies. We used three techniques that attempt to deal with various aspects of the observed  
560 incongruence between loci. The maximum parsimony approach of MDC is a summary method  
561 deriving a species tree from the distribution of gene trees with single or multiple terminals per

species, intended to address the effects of ILS (Maddison 1997; Maddison and Knowles 2006). Although infrequently considered in recent studies, MDC has been implemented in multiple packages (Maddison and Maddison 2011; Than et al. 2008) and offers superior speed of analysis when compared to other MSC techniques. In case of our complete dataset, a run with 100 bootstrap datasets took a few minutes. The resulting topology is nonetheless very different from the other results, showing a number of unexpected and poorly supported groupings. The lumping of all non-*Heliconius* genera, and the monophyletic *Neruda/xanthocles/wallacei* clade stand out in contrast to other proposed trees (Sup. Fig. S6). Interestingly, many of the relations that are poorly supported in the supermatrix phylogenies are also not resolved in the consensus MDC tree, showing that MDC is highly conservative with regard to the placement of taxa unstable in individual gene trees.

The Bayesian MSC approach implemented in \*BEAST uses MCMC to co-estimate the species-level tree and the contained gene trees by estimating demographic parameters together with the phylogeny, but only with an appropriate intraspecific sampling (Heled and Drummond 2010). Although computationally intensive, \*BEAST models ILS and proposes a species tree without ignoring the underlying heterogeneity in specific locus genealogies, performing exceptionally well even with the most difficult cases combining large population size with short divergence times (Leaché & Rannala 2010). We analysed the small dataset of the 17 best-sampled species and recovered a tree which agrees with the supermatrix analyses (Sup. Fig. S2), except for the position of *Neruda aoede*, which was placed as a sister taxon to the *H. xanthocles/L. doris* clade with relatively low posterior probability. Furthermore, the mean ages of nodes are nearly identical to those proposed in a supermatrix analysis, with similar 95% confidence intervals. Although the species tree is largely as predicted, we observe high levels of incongruence in the underlying distribution of gene trees (Sup. Fig. S1). Differences in the depth of coalescence are clear throughout the tree and reticulation is again especially apparent in the *H. melpomene/cydno* clade. The estimated population size values are also consistent with a previous comparison based on two nuclear loci, showing a higher population size of *H. erato* ( $1.33 \times 10^6$  individuals) when compared to



588 *H. melpomene* ( $1.02 \times 10^6$ ) (Flanagan et al. 2004).

589 While \*BEAST is a powerful approach to account for ILS under a complex evolutionary  
590 model, it does not take into account various other sources of data heterogeneity. BUCKy derives a  
591 topology together with CFs, which represent the proportion of the genome supporting a particular  
592 clade. The most likely clade may therefore receive low support if it is represented in only a few of  
593 the Bayesian gene tree posteriors (Larget et al. 2010). The method is thus able to propose a robust  
594 topology in the face of ILS, hybridisation or other complex processes. As described above, we find  
595 the phylogeny derived by BUCKY to be entirely consistent with the Bayesian analysis of  
596 concatenated sequence, although the recovered CFs are much lower than any other measure of  
597 support applied to our data. Importantly, most of the nodes connecting the major clades in the tree  
598 have CFs below 0.5, with the notable exception of the *silvaniform/melpomene* split (Fig. 4). The  
599 same nodes correspond to the reticulations in the NeighborNet analysis (Sup. Fig. S3), cases of low  
600 support in the MDC tree and its disagreement with the supermatrix analysis (Sup. Fig. S6), nodes  
601 that cannot be rejected in the ML tests of topologies (Table 2), and the uncertain nodes in the whole  
602 mitochondrial tree (Fig. 3).

603

#### 604 *Tempo of Diversification*

605 The phylogeny estimated under a relaxed clock model in BEAST shows diversification  
606 dynamics that differ from previous estimates, with the splits between the genera of Heliconiini  
607 being older and the extant species and subgenera much younger than previously thought (Table  
608 3)(Mallet et al. 2007). The most speciose genera *Heliconius* and *Eueides* separated 17 Ma and both  
609 started to diversify around 10 Ma, and the six major clades of *Heliconius* (corresponding to *H.*  
610 *erato*, *H. sara*, *H. xanthocles*, *H. wallacei*, *H. melpomene/silvaniforms* and *Neruda*) all started to  
611 diversify between 5 and 4 Ma (Fig. 1). The lineage through time plot (LTT) for Heliconiini suggests  
612 a period of stasis corresponding to the mid-Miocene 16-11 Ma (Hoorn et al. 2010), and followed by  
613 a sudden increase in the number of extant lineages (Fig. 5a). In case of the 45 *Heliconius* species, a



shorter slowdown is found between 7 and 4.5 Ma (Fig. 5b) (Hoorn et al. 2010). As expected from the LTT plots, the MCCR test detects no evidence for an overall slowdown in the diversification rate (Heliconiini:  $\gamma = 2.643$ ,  $p = 0.996$ ; *Heliconius*:  $\gamma = 0.153$ ,  $p = 0.617$ ).

Maximum Likelihood (ML) modelling strongly supports the Birth-Death model with rate shift as the best fit for Heliconiini (Akaike weight of 0.92; Table 4). Both DDD and turboMEDUSA models demonstrate that around 11 Ma the speciation rate of Heliconiini increased dramatically from 0.19 to 0.40 new species per lineage per million years, and the shift was accompanied by an increase in the turnover rate from 0.11 to 0.65. The results for *Heliconius* are less clear, as equal Akaike weights (0.30) are given to the Pure Birth models without rate changes, and with an almost twofold increase in speciation rate 4.5 Ma (Table 4). TurboMEDUSA and DDD models allowing for a shift at an unspecified time also find that speciation accelerated 10-11 Ma and 4-5 Ma.

## 640 DISCUSSION

641

### 642 *Stable Topology Despite Marker Incongruence*

643       We approached the problem of phylogeny reconstruction in a difficult mimetic assemblage  
644 through extensive intraspecific sampling of 22 markers from nearly all species in the clade, and  
645 compared the results between multiple philosophically distinct analytical approaches. As next  
646 generation sequencing technologies become widely accessible and the average number of loci used  
647 in systematic studies increases rapidly, Multi-Species Coalescent (MSC) methods gain in  
648 importance as means of detecting and accounting for incongruence in multilocus data (e.g. Lee et al.  
649 2012; Barker et al. 2013; Smith et al. 2013). However, their relative merits and utility at different  
650 levels remains contested (Song et al. 2012; Gatesy and Springer 2013; Reid et al. 2013). The  
651 systematic relations of the tribe Heliconiini, which diverged from its extant outgroup about 47 Ma,  
652 can be effectively resolved with both MSC and supermatrix approaches, yielding highly similar  
653 topologies across a range of different sub-sampling schemes that correspond to the requirements of  
654 individual algorithms (Fig. 1, 3 and 4; Sup. Fig. S2-S6). Nonetheless, consistent with the recent  
655 radiation of the group, large effective population sizes and known hybridisation between many  
656 species, we observed high heterogeneity among sampled fragments of the genome that differ  
657 markedly in both topology (Fig. 2, Sup. Fig. S1) and rates of evolution (Concatenation analysis).  
658 Such heterogeneity might have been expected to pose a significant challenge for the concatenation  
659 methods (Degnan and Rosenberg 2006; Edwards et al. 2007; Edwards 2009; Knowles and Kubatko  
660 2010; Leaché and Rannala 2010). However, the only method producing an obviously different  
661 phylogeny is Minimising Deep Coalescences (MDC; Sup. Fig. S6), which fails to resolve 34 out of  
662 62 nodes in the tree with bootstrap support above 0.9, and is the only method to suggest monophyly  
663 of *Eueides* with other basal genera of Heliconiini. MDC derives a species tree from point estimates  
664 of gene trees and can be expected to perform poorly with a relatively limited number of gene trees  
665 that are not always fully resolved, leading to a complete polytomy in some of the clades (Gatesy  
666 and Springer 2013). However, the MDC result is an indicator of instability, as well-resolved and

667 consistent gene trees should produce a good quality MDC tree.

668         Recent studies have proposed that likelihood-based MSC techniques perform better than and  
669 should be preferred to integration over individual gene trees, due to their potential to capture  
670 synergistic effects between partitions (Leaché and Rannala 2010; Reid et al. 2013), mirroring the  
671 phenomenon of hidden support found when multiple markers are concatenated (Gatesy and Baker  
672 2005). Our results support this observation and further show that high degrees of conflict between  
673 many partitions can be reconciled by both supermatrix and MSC approaches to extract the  
674 predominant signal of speciation. The superiority of the MSC methods lies in the effective  
675 demonstration of incongruences, represented by lower support values or concordance factors  
676 assigned to the more difficult nodes (Belfiore et al. 2008). The Bayesian concordance analysis in  
677 BUCKy assigns insignificant concordance factors to most of the nodes separating major subgenera  
678 of *Heliconius*. Two of these nodes (*H. wallacei* and *N. aoede*; Fig. 4) are also only weakly  
679 supported by the \*BEAST coalescent model, and correspond to the areas of high reticulation in the  
680 NeighborNet network, reflecting conflicting signals (Sup. Fig. S3). The same nodes are all assigned  
681 a posterior probability of one in the Bayesian supermatrix analysis (Fig. 1), potentially leading to  
682 the erroneous conclusion that all the data point unequivocally to the inferred relations.

683         Our study highlights an important practical consideration in choosing the optimal analytical  
684 approach, where the requirements of the selected algorithm have to be reconciled with a realistic  
685 sampling of taxa. Our final goal of testing hypotheses regarding the diversification dynamics of  
686 Heliconiini can be met only if the number of included taxa is maximised. Despite a substantial  
687 effort we only managed to secure single samples of the rare or geographically restricted species, and  
688 some of them are represented solely by historical specimens with limited potential to generate  
689 extensive multilocus data. Considering that our study group is intensively studied and exceptionally  
690 well represented in research, museum and private collections due to its aesthetic appeal (Mallet et  
691 al. 2007), it would be considerably more challenging to obtain a complete sampling of many other  
692 groups. Another difficulty stems from the fact that the advanced coalescent techniques like BUCKy

and \*BEAST perform best with multiple samples per species, which should capture intraspecific diversity (Heled & Drummond 2010, Reid et al. 2013). Finally, much of the uncertainty in the estimates can be attributed to missing data, which can negatively affect the estimation of both individual gene trees and the encompassing species tree (Wiens and Morrill 2011; Roure et al. 2013). When fitting a NeighborNet network, we found that although the percentage of data missing from the matrix does not explain all of the observed reticulation and the high delta score, it causes these parameters to increase, thus suggesting that the data completeness at each alignment position must be maximised to identify genuine incongruence. We observe that in many cases of biological interest it will be a formidable challenge to generate the ideal dataset that (i) has little missing data, (ii) comprises a large, genome-wide sample of loci, (iii) includes all taxa, and (iv) captures intraspecific variability. In case of Heliconiini, the supermatrix approach based on a limited number of markers (22) helped us to maximise taxonomic inclusiveness without compromising our ability to reconstruct a phylogeny in the light of conflicting biological signals.

# *Divergence time estimates*

Our phylogeny of Heliconiini brings novel insight into the diversification dynamics of the clade. Although most age estimates for *Heliconius* agree with other studies, the deeper nodes are older than previously suggested (Table 3). There is little agreement on the dates above the species level, and the studies to date either suffer from insufficient taxon sampling (Pohl et al. 2009, Wahlberg et al. 2009, Cuthill and Charleston 2012; Table 3), or use markers unlikely to be informative above a relatively low level of divergence (Mallet et al. 2007). For instance, the mean age of the split between *Heliconius* and *Agraulis* is estimated as 32 Ma in the study of Pohl et al. (2009), which includes only 3 species of Heliconiini; 26.5 Ma in Wahlberg et al. (2009), including one species per genus; or 21 Ma in the present study (Fig. 1; Table 3). Conversely, Mallet et al. (2007) find the divergences between the basal genera of Heliconiini to be much younger than we propose, likely due to an effect of using a fast-evolving mitochondrial locus without partitioning

719 (Brandley et al. 2011).

720 Our own ability to correctly falsify the hypotheses regarding the diversification of  
721 Heliconiini hinges on having a nearly complete phylogeny, yet none of our MSC analyses consider  
722 as many species of Heliconiini as the Bayesian supermatrix estimate. We are confident that the  
723 values proposed by the supermatrix method can be trusted, as both the topology and the branch  
724 lengths are consistent with the results inferred by \*BEAST based on a smaller dataset (Table 3;  
725 Sup. Fig. S2). We find that the ages of the deeper nodes and the length of terminal branches are not  
726 inflated by the supermatrix method in comparison to \*BEAST, contrary to the predictions from  
727 simulations (Burbrink and Pyron 2011), and both methods infer similar mean age for the observed  
728 splits, for instance 10.5 Ma for the basal divergence of *Heliconius* into the *H. erato* and *H.*  
729 *melpomene* lineages, or 2-3 Ma for the diversification of *H. melpomene* and silvaniform clades.  
730 Hence we offer a new perspective on the dating of Heliconiini radiation with a nearly complete set  
731 of divergence time estimates based on a well-resolved and supported tree.

732

733

# 734 *Rapid Adaptive Radiation of Heliconius*

735 *Heliconius* have undergone a rapid adaptive radiation *sensu* Schluter (2000), associated with  
736 the evolution of Müllerian mimicry, close coevolution with the Passifloraceae host plants (Benson  
737 et al. 1975) and other traits unique among the Lepidoptera (reviewed by Beltrán et al. 2007).  
738 Maximum Likelihood models demonstrate that around 11 Ma the speciation rate of Heliconiini  
739 increased dramatically from 0.19 to 0.40 new species per lineage per million years, and the shift  
740 was accompanied by an increase in the turnover rate from 0.11 to 0.65, indicating higher likelihood  
741 of extinction of the lineages. Our results are consistent with the radiation having been stimulated by  
742 environmental factors such as mountain uplift, and creation of elevation gradients facilitating  
743 parapatric speciation (Wesselingh et al. 2009, Hoorn et al. 2010, Turchetto-Zolet et al. 2013).  
744 Consistent with the inference of the Central and Eastern Andean slopes as the “species pump” of

745 Heliconiini (Rosser et al. 2012), we find that diversification of *Heliconius* and *Eueides* into  
 746 subgeneric clades occurred within the two million years after the major Andean uplift event 12 Ma,  
 747 and that the modern species of *Heliconius* started to diversify after the last intensive orogenic event  
 748 4.5 Ma (Gregory-Wodzicki 2000). Contrary to our expectations, mimicry does not leave a clear  
 749 signature of positive feedback on the rate of diversification. Although mimetic interactions have  
 750 been repeatedly invoked as drivers of speciation in Heliconiini and butterflies generally (Bates  
 751 1862; McMillan et al. 1997; Mallet and Joron 1999; Elias et al. 2008; Jiggins 2008; Savage and  
 752 Mullen 2009) and mimicry can possibly decrease the risk of extinction as a consequence of reduced  
 753 predation rates (Vamosi 2005), model fitting does not support an exponential increase in rates of  
 754 speciation.

755         Although we find sudden increases in speciation rates, there is no indication that the rates  
 756 slowed down significantly afterwards. This result is consistent with a recent critique (Day et al.  
 757 2013) of the traditional prediction that large radiations should display a pattern of an initially high  
 758 net diversification rate, decreasing as the ecological niches fill up (e.g. Rabosky and Lovette 2008).  
 759 This expectation is reasonable for spatially limited island radiations that constitute the majority of  
 760 study cases to-date, but it does not necessarily apply to continental radiations in the tropics, where  
 761 the scale and complexity of the ecosystems are likely to generate a number of suitable niches  
 762 greatly exceeding even the cladogenetic potential of large radiations (Day et al. 2013). So far,  
 763 steady diversification of a widely distributed taxon has been demonstrated in the African *Synodontis*  
 764 catfish (Day et al. 2013) and the Neotropical Furnariidae ovenbirds (Derryberry et al. 2011), but the  
 765 generality of this pattern remains unknown. Heliconiini constitute an interesting case of a  
 766 widespread, continental radiation where at least one sharp transition to a higher species turnover  
 767 punctuates an otherwise steady diversification. Thus the physical environment has acted a driver of  
 768 diversification, but did not limit cladogenesis.

769         Some uncertainty surrounds the last few million years of evolution of Heliconiini. Early  
 770 speculation regarding the drivers of speciation suggested diversification in allopatry, as the

rainforest habitat occupied by most species in the group has undergone cycles of contraction and expansion in response to recent climatic variation (Turner 1965; Brown et al. 1974; Brown 1981; Sheppard et al. 1985; Brower 1994a). The hypothesis of vicariant cladogenesis has been subsequently criticised due to a lack of evidence for forest fragmentation in pollen core data (Colinvaux et al. 2000, Dasmahapatra et al. 2010), as well as the likelihood of parapatric speciation (Mallet et al. 1998). The decrease in observed diversification over the last million years is likely due to our limited ability to delineate species in the assemblages of highly variable taxa like *Heliconius* – a phenomenon that has been termed “protracted speciation” (Etienne & Haegemann 2012). We provide direct evidence that most specific divergences between species of Heliconiini occurred during the Miocene, and that both climate and orogeny strongly influenced the pattern of diversification, although we cannot directly test the causes of this association with these data.

782

### 783 *Taxonomic and Systematic Implications*

Application of novel algorithms to the Heliconiini data reveals a relatively stable topology despite limited support. We uphold the previous re-classification of the species in the genera *Neruda* (Huebner 1813) and *Laparus* (Linnaeus 1771) as *Heliconius* based on their nested position (Beltrán et al. 2007). This placement is at odds with morphological evidence from adult and larval characters, which puts *Neruda* and *Laparus* together with *Eueides* (Penz 1999), suggesting convergent evolution of homoplasious morphological characters. Nevertheless, the molecular evidence is decisive and we thus synonymize *Laparus* **syn. nov.** and *Neruda* **syn. nov.** with *Heliconius*.

The position of the enigmatic genus *Cethosia* remains unresolved, as it currently depends on the chosen method of analysis, and is unlikely to be established without a broad sampling of species using multiple markers. *Cethosia* has been variably considered to be either the only Old World representative of Heliconiini (Brown 1981; Penz and Peggie 2003; Beltrán et al. 2007), a genus of Acraeini (Penz 1999; Wahlberg et al. 2009), or possibly a distinct tribe (Müller and Beheregaray

2010). Establishing the systematic relations between Acraeini, *Cethosia* and Heliconiini is important for the study of Heliconiini macroevolution, as it could shed light on the origins of the heliconian affinity for the Passifloraceae host plants. Known records indicate that *Cethosia* species feed on *Adenia* and *Passiflora* (Müller and Behergaray 2010), raising the possibility that Heliconiini may have evolved from an Australasian ancestor that already exhibited the modern dietary preference.

Heliconiini have been at the centre of the debate about species concepts and designation criteria, providing empirical evidence for the permeability of species barriers (Mallet et al. 2007, Nadeau et al. 2012, Martin et al. 2013). At the same time, new species continue to be described based on morphological, genetic or karyotypic evidence (Lamas et al. 2004; Constantino and Salazar 2010; Dasmahapatra et al. 2010; Moreira and Mielke 2010), although the validity of the taxonomic status of some of these new lineages is disputed (J. Mallet and A. Brower, *pers. comm.*). Our diversification analysis is therefore prone to error resulting from the uncertainty in the number of terminal taxa that should be considered. We assume the number of species in the clade to be 78, reflecting the published taxonomy (Lamas 2004; Constantino and Salazar 2010; Rosser et al. 2012), and we deliberately exclude a formally undescribed species of *Agraulis*. Although we included *H. tristero* at the time of our analysis, it is not considered a species any longer (Mérot et al. 2013). In addition, a recent study suggests that *Philaethria pygmalion* and *Philaethria wernickei* may in fact constitute a single species (Barão et al. 2014). Although the number of Heliconiini species may therefore vary between 73 and 79, changing the number of missing species in the diversification analyses does not alter the results substantially.

## Conclusion

We present a taxonomically comprehensive phylogeny of a large continental radiation characterised by extensive hybridisation, adaptive introgression and rapid speciation, and emerging as a prominent system for comparative genomics. The tribe Heliconiini has radiated in association



with environmental change in the Neotropics over the past 23 Ma and that speciation and species turnover increased dramatically at the end of the Mid-Miocene. Although there is a clear signature of processes leading to incongruence of individual gene trees and the species tree, we consistently recover the same topology using different analytical approaches. We conclude that the established supermatrix methods perform well, but are less effective in detecting the underlying conflict and estimating nodal support than the alternative Multispecies Coalescent techniques.

Müllerian mimicry affects the mode of speciation in *Heliconius*, and probably plays a role for the other, less researched genera of Heliconiini as well. Parapatry and sympatry are likely of importance in the ecological speciation of the butterflies, due to the dual role of wing patterns as both aposematic warnings under strong selection and essential cues for mating (Jiggins et al. 2001, Merrill et al. 2012). As incipient species diverge in their patterns by co-evolving with differently patterned co-mimics from multiple sympatric mimicry rings, assortative mating can lead to further genetic isolation of the lineages, enabling further divergence (Merrill et al. 2012). Conversely, the adaptive value of locally advantageous patterns facilitates adaptive introgression of pattern loci between species (Mallet et al 2007, Heliconius Genome Consortium 2012, Martin et al. 2013). Mimicry is thus an important factor in enhancing gene flow between species of *Heliconius* and *Eueides*, likely contributing to the observed levels of discordance between sampled markers. The seemingly unusual aspects of our study system, including introgression, hybridisation and speciation in sympatry, have all been only recently recognised as important evolutionary processes. We expect that reticulate signals in phylogenetic data will be increasingly important in future systematic studies and the Heliconiini represents a case study where the knowledge of specific microevolutionary processes can inform our understanding of cladogenesis at deeper timescales.

850

# 851 AUTHOR CONTRIBUTIONS

852 Designed the study : KMK, NW and CDJ. Carried out the experiments, analysed the data and  
853 drafted the manuscript: KMK. Contributed novel materials and reagents: CDJ, JM, KD, NW and  
854 AN. All authors have read and approved the final version of the manuscript.

855

# 856 FUNDING

857 KMK is funded by the Herchel Smith Trust, Emmanuel College and the Balfour Studentship from  
858 the Department of Zoology, Cambridge University. CDJ was supported by the Leverhulme Trust  
859 Leadership Grant. NW acknowledges funding from Kone Foundation. JM and KKD were funded  
860 through the BBSRC grant BB/G006903/1.

861 The authors declare no conflict of interest.

862

# 863 ACKNOWLEDGMENTS

864 Computational analyses were performed on the RAM—bio server at the School of Life Sciences,  
865 University of Cambridge, with extensive support from Jenny Barna. We are grateful to Brian  
866 Counterman, Laura Ferguson, Marcus Kronforst, Owen McMillan and Gilson Moreira for the  
867 permission to use unpublished Illumina data. We appreciate the specimens shared by Christian  
868 Brévignon, Luis Constantino, Frank Jiggins, Mathieu Joron and the curators at Harvard Museum of  
869 Comparative Zoology, McGuire Centre, Natural History Museum London and Naturhistorisches  
870 Museum Wien. We thank Nick Mundy for the permission to use vertebrate laboratory facilities.  
871 Jessica Leigh offered help with Concatepillar. Rampal Etienne and Carlos Peña advised us on the  
872 diversification analysis. Members of the Butterfly Genetics Group, Rob Asher, Andrew Brower,  
873 Matthieu Joron, Nick Mundy, Albert Phillimore and Neil Rosser provided helpful comments on the  
874 results.

875

876

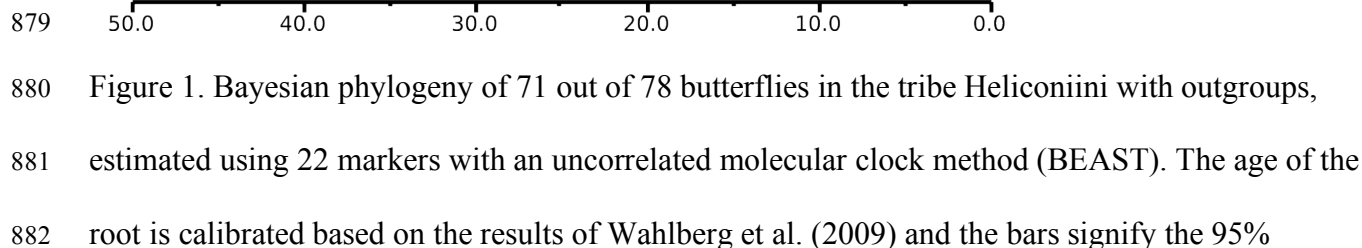

confidence intervals around the mean node ages. The dots indicate the Bayesian posterior probability of the splits: >99% (black), 95-99% (grey), <95% (white). Scale axis in Ma. Red triangles indicate the periods of Andean orogenesis 23, 12 and 4.5 Ma and the blue asterisk marks the end of the Mid-Miocene Global Optimum (Hoorn et al. 2010). Deep splits are shown within the well-studied *Heliconius erato* and *H. melpomene*. FG=French Guiana. Heliconiini exhibit complex patterns of divergence and convergence in aposematic wing patterns, top to bottom: *Actinote latior* (outgroup), *Eueides tales michaeli*, *E. lampeto lampeto*, *H. telesiphe telesiphe*, *H. erato favorinus*, *H. demeter ucayalensis*, *H. sara*, *H. aoede*, *H. doris* (blue morph), *H. burneyi jamesi*, *H. melpomene amaryllis*, *H. timareta ssp.*, *H. numata lyrcaeus*, *H. pardalinus dilatus*.

909

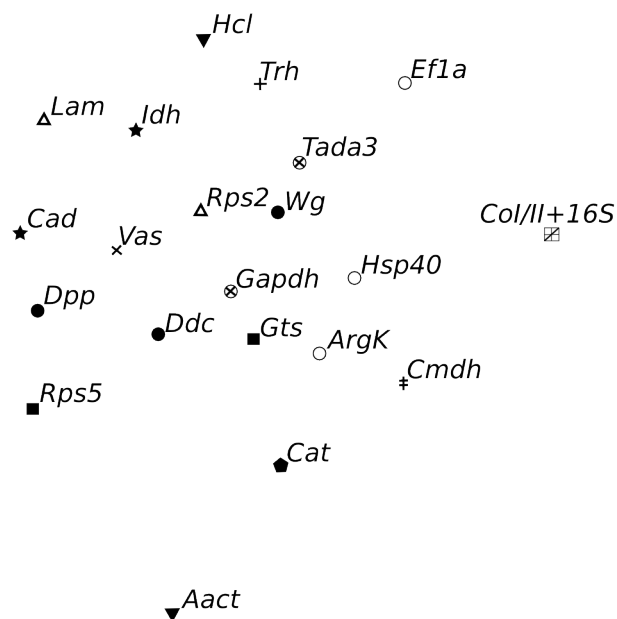

910

911 Figure 2. Multi-dimensional scaling ordination of pairwise Robinson-Foulds distances between 21  
 912 gene trees fitted in the Tree Set Visualiser shows no clear patterns of incongruence between the  
 913 markers. Phylogenies of two mitochondrial and 20 nuclear markers were estimated in MrBayes.  
 914 The axes have no units.

915

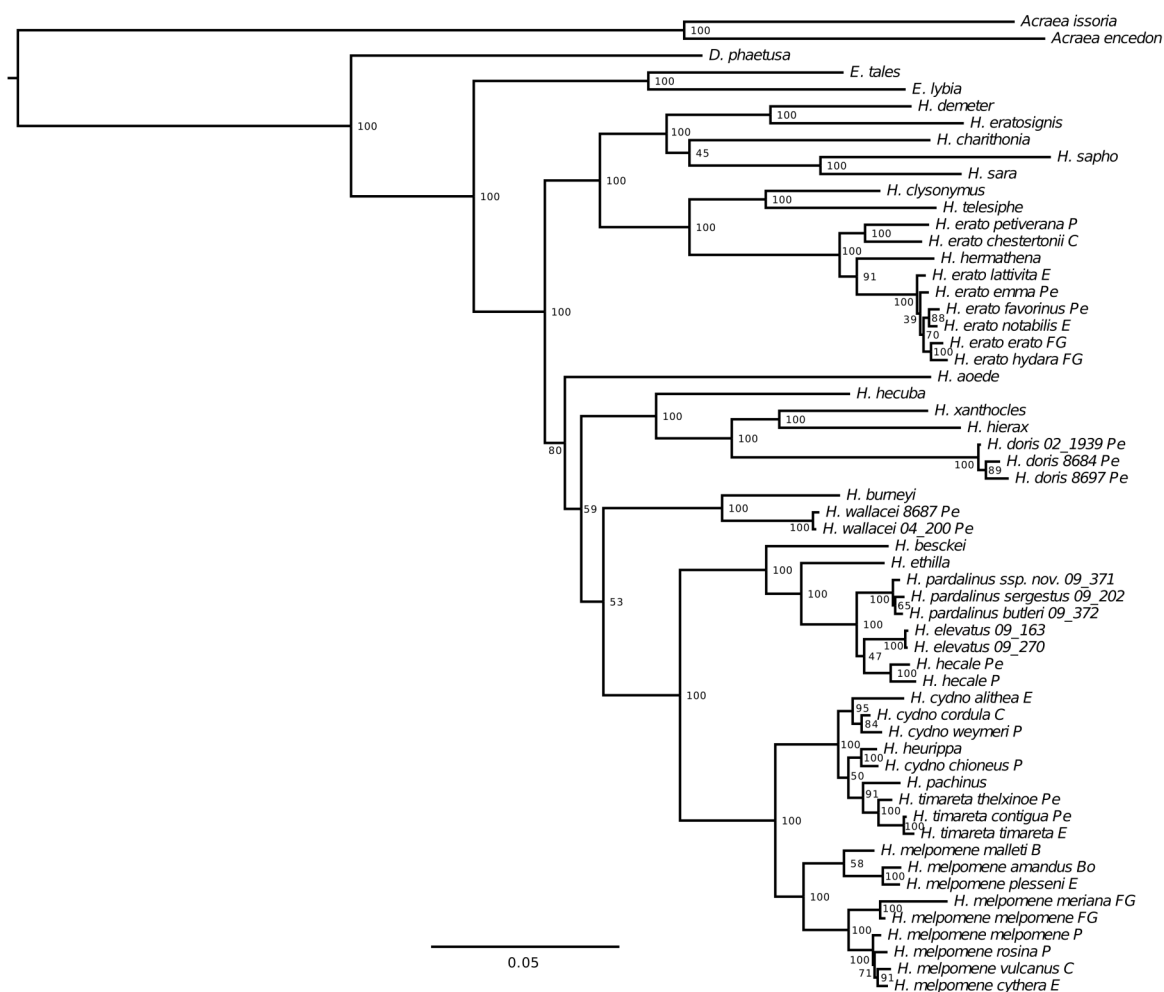

916

917 Figure 3. Whole mitochondrial maximum likelihood (RAxML) phylogeny of the genus *Heliconius*.

918 Bootstrap support values indicated. Scale bar in units of substitution per site per million years.

919 B=Brazil, Bo=Bolivia, C=Colombia, E=Ecuador, FG=French Guiana, P=Panama, Pe=Peru.

920

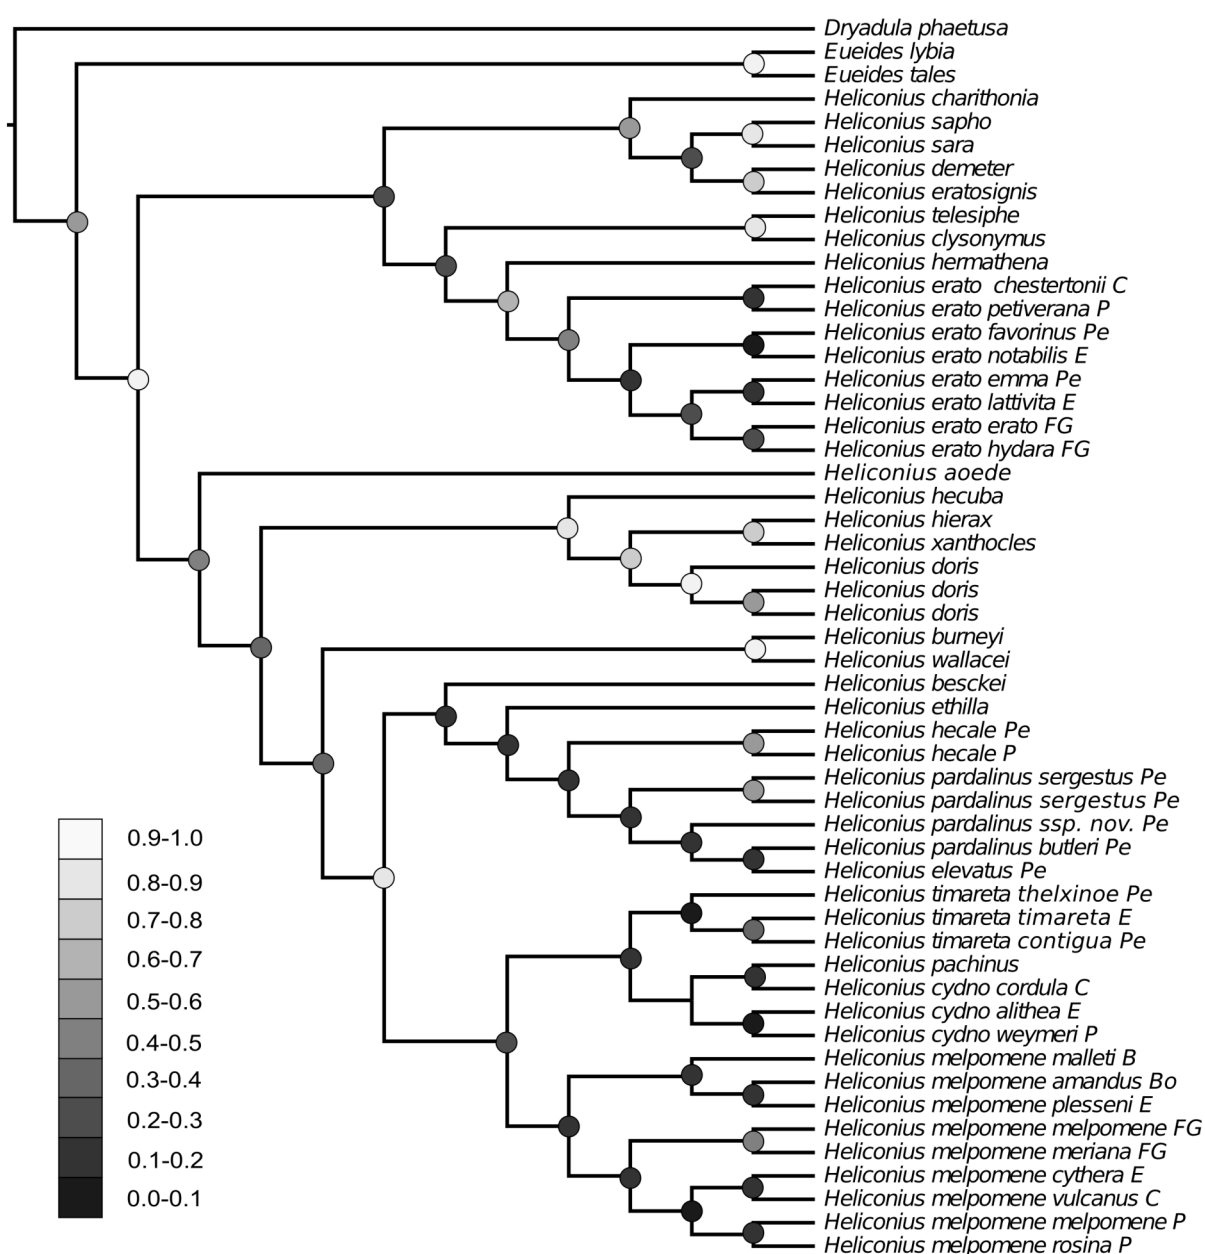

921

922 Figure 4. A phylogenetic hypothesis for *Heliconius* showing the extent of concordance between tree

923 topologies of the 21 loci estimated by Bayesian concordance analysis in BUCKy. Dots indicate the

924 Concordance Factor values for the nodes, with darker shades of grey corresponding to lower

925 support values. B=Brazil, Bo=Bolivia, C=Colombia, E=Ecuador, FG=French Guiana, P=Panama,

926 Pe=Peru.

927

## A: Heliconiini

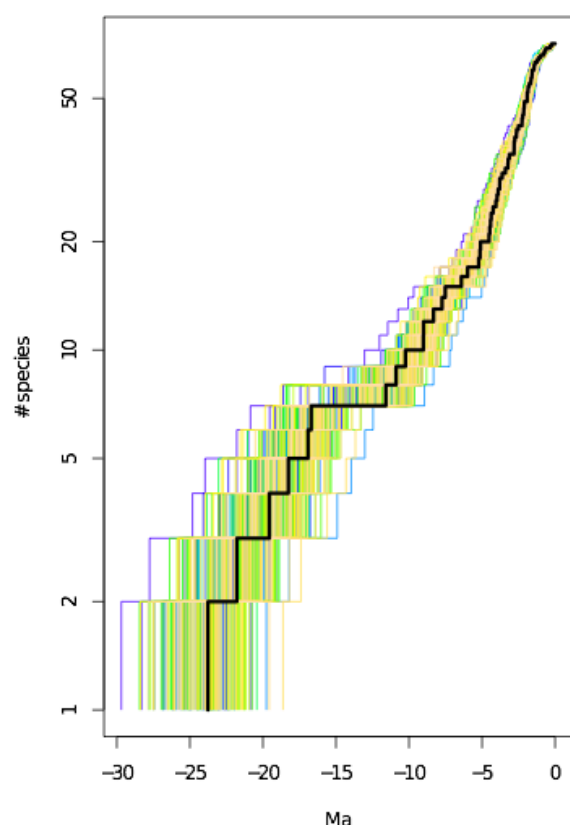

## B: *Heliconius*

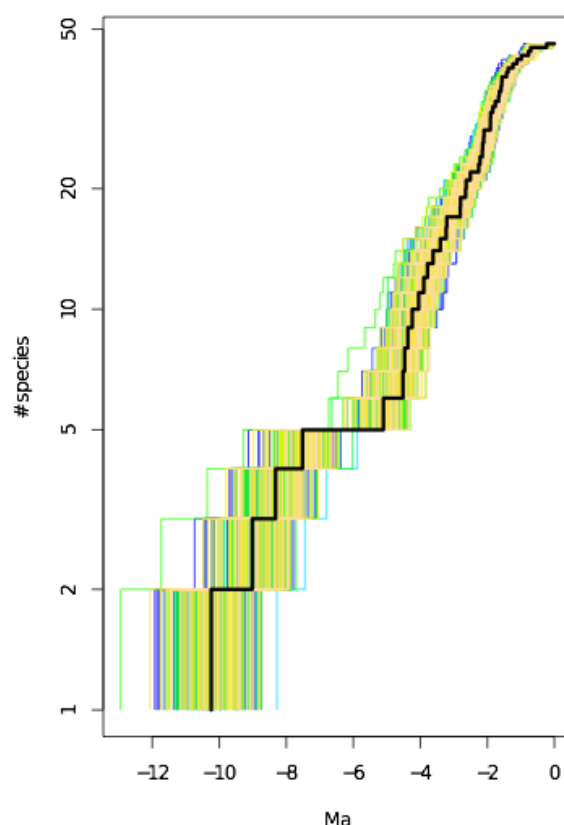

Figure 5. Lineage through time (LTT) plots based on the calibrated, uncorrelated molecular clock analysis in BEAST. A. Semilogarithmic LTT plot of the Heliconiini butterflies with the maximum clade credibility phylogeny in black and a random sample of 200 posterior trees around. B. LTT plot for *Heliconius*.



| Marker                    | Name                                            | Type         | Chromosome    | Length<br>(bp) <sup>a</sup> | #Variable<br>sites <sup>a</sup> | # Pars.<br>Inf. <sup>a</sup> | Model:<br>full<br>dataset                   | Model:<br>single-<br>individual | Model:<br>*BEAST |
|---------------------------|-------------------------------------------------|--------------|---------------|-----------------------------|---------------------------------|------------------------------|---------------------------------------------|---------------------------------|------------------|
| <i>Col/II</i> , codon 1+2 | <i>cytochrome oxidase I/II</i>                  | mt CDS       | mitochondrion | 1589                        | 265                             | 190                          | GTR+G                                       | GTR+G                           | GTR+I            |
| <i>Col/II</i> , codon 3   | <i>cytochrome oxidase I/II</i>                  | mt CDS       | mitochondrion | 745                         | 666                             | 611                          | GTR+G                                       | GTR+G                           | GTR+G            |
| <i>tRNA-Leu</i>           | <i>Leucine tRNA</i>                             | tRNA         | mitochondrion | 77                          | 17                              | 8                            | Concatenated with <i>Col/II</i> , codon 1+2 |                                 |                  |
| <i>16S</i>                | <i>ribosomal subunit 16</i>                     | rDNA         | mitochondrion | 533                         | 160                             | 128                          | GTR+G                                       | GTR+G                           | GTR+G            |
| <i>Aact</i>               | <i>acetoacetyl CoA-thiolase</i>                 | nuclear exon | 18            | 743                         | 235                             | 160                          | GTR+G                                       | GTR+G                           | GTR+G            |
| <i>ArgK</i>               | <i>arginine kinase</i>                          | nuclear exon | 10            | 608                         | 199                             | 162                          | SYM+G                                       | GTR+G                           | GTR+G            |
| <i>Cad</i>                | <i>carbamyl P-synthetase</i>                    | nuclear exon | 20            | 810                         | 311                             | 256                          | GTR+G                                       | GTR+G                           | GTR+G            |
| <i>Cat</i>                | <i>catalase</i>                                 | nuclear exon | Z             | 739                         | 270                             | 211                          | HKY+G                                       | GTR+G                           | GTR+G            |
| <i>Cmdh</i>               | <i>cytosolic malate dehydrogenase</i>           | nuclear exon | 19            | 790                         | 292                             | 232                          | GTR+G                                       | HKY+G                           | GTR+G            |
| <i>Ddc</i>                | <i>dopadecarboxylase</i>                        | nuclear exon | 1             | 339                         | 140                             | 108                          | GTR+G                                       | GTR+G                           | HKY+G            |
| <i>Dpp</i>                | <i>decapentaplegic</i>                          | nuclear exon | 19            | 315                         | 111                             | 93                           | HKY+G                                       | GTR+G                           | HKY+G            |
| <i>Efla</i>               | <i>elongation factor 1a</i>                     | nuclear exon | 10            | 1189                        | 330                             | 262                          | GTR+G                                       | HKY+G                           | GTR+I            |
| <i>Gapdh</i>              | <i>glyceraldehyde 3-phosphate dehydrogenase</i> | nuclear exon | 5             | 722                         | 229                             | 181                          | GTR+G                                       | GTR+G                           | GTR+G            |
| <i>Gts</i>                | <i>glycyl-tRNA synthetase</i>                   | nuclear exon | 11            | 936                         | 333                             | 218                          | GTR+G                                       | GTR+G                           | GTR+G            |
| <i>Hcl</i>                | <i>hairy cell leukemia protein</i>              | nuclear exon | 18            | 761                         | 203                             | 137                          | GTR+G                                       | HKY+G                           | GTR+G            |
| <i>Hsp40</i>              | <i>heat shock protein 40</i>                    | nuclear exon | 10            | 539                         | 194                             | 149                          | GTR+G                                       | GTR+G                           | HKY+G            |
| <i>Idh</i>                | <i>isocitrate dehydrogenase</i>                 | nuclear exon | 20            | 678                         | 251                             | 223                          | GTR+G                                       | GTR+G                           | HKY+G            |
| <i>Lam</i>                | <i>laminin</i>                                  | nuclear exon | 17            | 880                         | 306                             | 191                          | GTR+G                                       | GTR+G                           | GTR+G            |
| <i>Rps2</i>               | <i>ribosomal protein 2</i>                      | nuclear exon | 17            | 419                         | 142                             | 115                          | GTR+G                                       | GTR+G                           | GTR+G            |

|              |                                                    |              |    |     |     |     |       |       |       |
|--------------|----------------------------------------------------|--------------|----|-----|-----|-----|-------|-------|-------|
| <i>Rps5</i>  | <i>ribosomal protein 5</i>                         | nuclear exon | 11 | 615 | 192 | 154 | GTR+G | GTR+G | GTR+G |
| <i>Tada3</i> | <i>transcriptional adaptor 3</i>                   | nuclear exon | 5  | 757 | 285 | 234 | GTR+G | GTR+G | GTR+G |
| <i>Trh</i>   | <i>trachealess</i>                                 | nuclear exon | 9  | 677 | 258 | 227 | GTR+G | SYM+G | GTR+G |
| <i>Vas</i>   | <i>ATP synthase 21 kDa<br/>proteolipid subunit</i> | nuclear exon | 13 | 723 | 192 | 136 | GTR+G | GTR+G | HKY+I |
| <i>Wg</i>    | <i>wingless</i>                                    | nuclear exon | 1  | 374 | 181 | 137 | SYM+G | GTR+G | GTR+G |

Table 1. Position in the genome, variability statistics and models of sequence evolution for two mitochondrial and 20 nuclear markers used in the study. Statistics are reported for the core alignment including outgroups.

948

| Grouping                                    | Likelihood | ELW probability | SH result |
|---------------------------------------------|------------|-----------------|-----------|
| ML tree                                     | -142583    | 0.117           |           |
| <i>Cethosia</i> + <i>Heliconiini</i>        | -142594    | 0.048           |           |
| <i>Agraulis</i> + <i>Dione</i> basal        | -142599    | 0.006           |           |
| basal genera monophyletic                   | -142596    | 0.025           |           |
| <i>Dryas</i> + <i>Dryadula</i> monophyletic | -142593    | 0.058           |           |
| <i>Neruda</i> not in <i>Heliconius</i>      | -142636    | 0.000           | $p<0.05$  |
| <i>Laparus</i> not in <i>Heliconius</i>     | -143233    | 0.000           | $p<0.05$  |
| <i>H. erato</i> monophyletic                | -142592    | 0.114           |           |
| <i>H. ricini</i> basal to <i>H. demeter</i> | -142590    | 0.084           |           |
| <i>H. antiochus</i> basal to <i>H. sara</i> | -142588    | 0.170           |           |
| primitive clade monophyletic                | -142613    | 0.000           | $p<0.05$  |
| <i>H. wallacei</i> monophyletic             | -142584    | 0.115           |           |
| <i>H. elevatus</i> monophyletic             | -142590    | 0.041           |           |
| <i>H. cydno</i> monophyletic                | -142619    | 0.001           | $p<0.05$  |
| <i>H. heurippa</i> with <i>H. timareta</i>  | -142586    | 0.209           |           |
| <i>H. melpomene</i> East+Guiana clade       | -142620    | 0.011           | $p<0.05$  |

949

950 Table 2. Maximum likelihood tests of alternative topologies. Phylogenies were estimated under  
951 constraints enforcing alternative topologies and compared to the original ML tree with the  
952 Shimodaira-Hasegawa test and the Expected Likelihood Weights test with 100 bootstrap replicates.

953

954

955

956

957

958

959

960

961

962

|                                   | <i>Heliconius</i><br>vs <i>Eueides</i> | <i>Heliconius</i> vs<br><i>Agraulis</i> | <i>Heliconius</i> vs<br><i>Philaethria</i> | <i>H. melpomene</i><br>vs <i>H. erato</i> | <i>H. erato</i> vs<br><i>H. hecalesia</i> |
|-----------------------------------|----------------------------------------|-----------------------------------------|--------------------------------------------|-------------------------------------------|-------------------------------------------|
| Mallet et al.<br>2007             | 11.0                                   | 13.0                                    | 14.5                                       | 9.5                                       | 4.0                                       |
| Pohl et al.<br>2009               | n/a                                    | 32.0<br>(40.0-24.0)                     | n/a                                        | 17.0<br>(11.0-23.0)                       | n/a                                       |
| Wahlberg et<br>al. 2009           | 18.5<br>(12.5-24.5)                    | 26.5<br>(21-32)                         | 30.0<br>(36.5-23.5)                        | n/a                                       | n/a                                       |
| Cuthill and<br>Charleston<br>2012 | 13.0<br>(10.5-16.5)                    | n/a                                     | n/a                                        | 10.5<br>(8-13.5)                          | 4.5<br>(2.8-6.3)                          |
| BEAST                             | 16.7<br>(14.1-19.5)                    | 21.8<br>(18.6-25.5)                     | 23.8<br>(20.3-27.7)                        | 10.2<br>(8.7-12.0)                        | 3.6<br>(3.0-4.4)                          |
| *BEAST                            | 17.5<br>(11.6-23.4)                    | n/a                                     | n/a                                        | 10.6<br>(14.9-6.7)                        | n/a                                       |

Table 3. Mean split ages in Ma at different levels of divergence within Heliconiini, as estimated by previous studies and by two Bayesian relaxed clock methods in the present work. Mean ages and 95% confidence intervals are reported where available.

| Model                  | $\lambda$   | $\lambda_2$ | $\mu$       | $\mu_2$     | K                  | K <sub>2</sub> | -lnL           | AICc          | wAIC        |
|------------------------|-------------|-------------|-------------|-------------|--------------------|----------------|----------------|---------------|-------------|
| <b>Heliconiini</b>     |             |             |             |             |                    |                |                |               |             |
| PB                     | 0.23        |             |             |             |                    |                | -158.48        | 319.01        | 0.00        |
| PB, shift 3.5 Ma       | 0.17        | 0.31        |             |             |                    |                | -155.43        | 315.04        | 0.00        |
| PB, shift 4.5 Ma       | 0.13        | 0.33        |             |             |                    |                | -152.27        | 308.72        | 0.03        |
| PB, shift 11 Ma        | 0.11        | 0.26        |             |             |                    |                | -155.57        | 315.32        | 0.00        |
| PB, shift 12 Ma        | 0.11        | 0.25        |             |             |                    |                | -155.82        | 315.81        | 0.00        |
| PB, any shift          | 0.12        | 0.32        |             |             |                    |                | -151.25        | 308.86        | 0.03        |
| BD                     | 0.38        |             | 0.26        |             |                    |                | -154.62        | 313.41        | 0.00        |
| BD, shift 3.5 Ma       | 0.31        | 0.31        | 0.23        | 0.00        |                    |                | -153.50        | 315.61        | 0.00        |
| BD, shift 4.5 Ma       | 0.16        | 0.33        | 0.04        | 0.00        |                    |                | -152.27        | 313.14        | 0.00        |
| <b>BD, shift 11 Ma</b> | <b>0.19</b> | <b>0.40</b> | <b>0.02</b> | <b>0.26</b> |                    |                | <b>-146.70</b> | <b>302.00</b> | <b>0.92</b> |
| BD, shift 12 Ma        | 0.21        | 0.37        | 0.02        | 0.25        |                    |                | -151.85        | 312.32        | 0.01        |
| BD, any shift          | 0.26        | 0.37        | 0.16        | 0.23        |                    |                | -153.82        | 318.56        | 0.00        |
| DD-E                   | 0.23        |             |             |             | Inf                |                | -158.48        | 321.13        | 0.00        |
| DDE1                   | 0.35        |             | 0.20        |             | 16x10 <sup>5</sup> |                | -154.27        | 314.90        | 0.00        |
| DDE5                   | 0.36        |             | 0.24        |             | 2190               |                | -153.64        | 313.63        | 0.00        |
| DDE1, shift 3.5 Ma     | 0.31        | 0.42        | 0.23        | 0.00        | 7912               | 208            | -153.41        | 320.13        | 0.00        |
| DDE1, shift 4.5 Ma     | 0.15        | 0.45        | 0.04        | 0.01        | Inf                | 171            | -151.97        | 317.25        | 0.00        |
| DDE1, shift 11 Ma      | 0.94        | 0.75        | 0.40        | 0.38        | 33                 | 68             | -155.09        | 323.49        | 0.00        |
| DDE1, shift 12 Ma      | 0.17        | 0.30        | 0.00        | 0.07        | 26                 | 941            | -154.36        | 322.02        | 0.00        |
| DDE1, any shift        | 0.16        | 0.49        | 0.01        | 0.07        | 71                 | 152            | -151.18        | 318.13        | 0.00        |
| <i>Heliconius</i>      |             |             |             |             |                    |                |                |               |             |
| <b>PB</b>              | <b>0.42</b> |             |             |             |                    |                | <b>-73.87</b>  | <b>149.82</b> | <b>0.30</b> |

|                         |             |             |      |      |                    |      |               |               |             |
|-------------------------|-------------|-------------|------|------|--------------------|------|---------------|---------------|-------------|
| PB, shift 3.5 Ma        | 0.38        | 0.44        |      |      |                    |      | -73.77        | 151.82        | 0.11        |
| <b>PB, shift 4.5 Ma</b> | <b>0.26</b> | <b>0.47</b> |      |      |                    |      | <b>-72.79</b> | <b>149.86</b> | <b>0.30</b> |
| BD                      | 0.43        |             | 0.02 |      |                    |      | -73.86        | 152.00        | 0.10        |
| BD, shift 3.5 Ma        | 0.60        | 0.44        | 0.39 | 0.00 |                    |      | -73.26        | 155.50        | 0.02        |
| BD, shift 4.5 Ma        | 0.26        | 0.47        | 0.00 | 0.00 |                    |      | -72.79        | 154.56        | 0.03        |
| DD-E                    | 0.42        |             |      |      | Inf                |      | -73.87        | 152.01        | 0.10        |
| DDE1                    | 0.45        |             | 0.07 |      | 6x10 <sup>5</sup>  |      | -73.88        | 154.34        | 0.03        |
| DDE5                    | 0.43        |             | 0.02 |      | Inf                |      | -73.86        | 156.70        | 0.01        |
| DDE1, shift 3.5 Ma      | 0.39        | 0.60        | 0.02 | 0.00 | 11x10 <sup>6</sup> | 111  | -73.51        | 161.16        | 0.00        |
| DDE1, shift 4.5 Ma      | 0.26        | 0.70        | 0.00 | 0.00 | Inf                | 85   | -72.18        | 158.51        | 0.00        |
| DDE1, any shift         | 0.38        | 0.45        | 0.01 | 0.00 | 128                | 9710 | -73.79        | 164.53        | 0.00        |

Table 4. Results of diversification model fitting to the maximum clade credibility chronograms of *Heliconiini* and *Heliconius*, estimated under a relaxed molecular clock model in BEAST. Models are compared in terms of corrected AIC (AICc) and relative Akaike weights (wAIC). Models: PB=Pure Birth, BD=Birth-Death, DD-E=Diversity Dependence without Extinction, DD+E1=Diversity Dependence with Extinction and a linear scaling of speciation term, DD+E5=Linear Dependence With Extinction and linear scaling terms for speciation and extinction. Where indicated, models include shifts in speciation and extinction rates at fixed times, or at any time.

998 REFERENCES

- 999 Akaike H. 1974. A new look at the statistical model identification. IEEE Trans. Automat. Contr.  
1000 19:716–723.
- 1001 Alfaro M.E., Santini F., Brock C., Alamillo H., Dornburg A., Rabosky D.L., Carnevale G., Harmon  
1002 L.J. 2009. Nine exceptional radiations plus high turnover explain species diversity in jawed  
1003 vertebrates. Proc. Natl. Acad. Sci. U. S. A. 106:13410–4.
- 1004 Anderson C.N.K., Liu L., Pearl D., Edwards S. V 2012. Tangled trees: the challenge of inferring  
1005 species trees from coalescent and noncoalescent genes. Methods Mol. Biol. 856:3–28.
- 1006 Ané C., Larget B., Baum D. a, Smith S.D., Rokas A. 2007. Bayesian estimation of concordance  
1007 among gene trees. Mol. Biol. Evol. 24:412–26.
- 1008 Antonelli A., Nylander J.A.A., Persson C., Sanmartí I. 2009. Tracing the impact of the Andean  
1009 uplift on Neotropical plant evolution. Proc. Natl. Acad. Sci. U. S. A. 106:9749-9754.
- 1010 Arias C.F., Muñoz A.G., Jiggins C.D., Mavárez J., Bermingham E., Linares M. 2008. A hybrid  
1011 zone provides evidence for incipient ecological speciation in *Heliconius* butterflies. Mol.  
1012 Ecol. 17:4699–712.
- 1013 Barão K.R., Gonçalves G.L., Mielke O.H.H., Kronforst M.R., Moreira G.R.P. 2014. Species  
1014 boundaries in *Philaethria* butterflies: an integrative taxonomic analysis based on genitalia  
1015 ultrastructure, wing geometric morphometrics, DNA sequences, and amplified fragment  
1016 length polymorphisms. Zool. J. Linn. Soc. 170:690-709.
- 1017 Barker F.K., Burns K.J., Klicka J., Lanyon S.M., Lovette I.J. 2013. Going to extremes: contrasting  
1018 rates of diversification in a recent radiation of new world passerine birds. Syst. Biol. 62:298–  
1019 320.
- 1020 Bates H. W. 1862. Contributions to an insect fauna of the Amazon valley. Lepidoptera:  
1021 Heliconidae. Trans. Linn. Soc. London 23:495-566.
- 1022 Bates H.W. 1863. The Naturalist on the River Amazons. London: John Murray.
- 1023 Baum D.A. 2007. Concordance trees, concordance factors, and the exploration of reticulate



1024 genealogy. *Taxon*. 56:417–426.

1025 Baxter S.W., Johnston S.E., Jiggins C.D. 2009. Butterfly speciation and the distribution of gene  
1026 effect sizes fixed during adaptation. *Heredity*. 102:57–65.

1027 Belfiore N.M., Liu L., Moritz C. 2008. Multilocus phylogenetics of a rapid radiation in the genus  
1028 *Thomomys* (Rodentia: Geomyidae). *Syst. Biol.* 57:294–310.

1029 Beltrán M., Jiggins C.D., Brower A.V.Z., Bermingham E., Mallet J. 2007. Do pollen feeding,  
1030 pupal-mating and larval gregariousness have a single origin in *Heliconius* butterflies? Inferences from multilocus DNA sequence data. *Bio. J. Linn. Soc.* 92:221–239.

1031 Beltrán M., Jiggins C.D., Bull V., Linares M., Mallet J., McMillan W.O., Bermingham E. 2002.  
1032 Phylogenetic discordance at the species boundary: comparative gene genealogies among  
1033 rapidly radiating *Heliconius* butterflies. *Mol. Biol. Evol.* 19:2176–90.

1034 Benitez-Vieyra S., Hempel de Ibarra N., Wertlen A.M., Cocucci A.A. 2007. How to look like a  
1035 mallow: evidence of floral mimicry between Turneraceae and Malvaceae. *Proc. Biol. Sci.*  
1036 274:2239–48.

1037 Benson W.W. 1972. Natural selection for Müllerian mimicry in *Heliconius erato* in Costa Rica.  
1038 *Science*. 176:936–939.

1039 Benson, W. W. , Brown, K. S., & Gilbert, L. E. . G. (1975). Coevolution of Plants and  
1040 Herbivores: Passion Flower Butterflies. *Evolution*, 29(4), 659–680.

1041 Biomatters Ltd 2012. Geneious. <http://www.geneious.com>

1042 Bouckaert R.R. 2010. DensiTree: making sense of sets of phylogenetic trees. *Bioinformatics*.  
1043 26:1372–3.

1044 Brandley M.C., Wang Y., Guo X., Oca A.N.M., Fería-Ortíz M., Hikida T., Ota H. 2011.  
1045 Accommodating heterogenous rates of evolution in molecular divergence dating methods: an  
1046 example using intercontinental dispersal of *Plestiodon* (Eumeces) lizards. *Syst. Biol.* 60:3–15.

1047 Briscoe A.D., Muños A.M., Kozak K.M., Walters J.R., Yuan F., Jamie G.A., Martin S.H.,  
1048 Dasmahapatra K., Ferguson L.C., Mallet J., Jacquin-Joly, Emmanuelle Jiggins C.D. 2013.

1050 Female Behaviour Drives Expression and Evolution of Gustatory Receptors in Butterflies.  
1051 PLoS Genet. 9(7).

1052 Brodie III E.D., Brodie Jr E.D. 2004. Venomous snake mimicry. In: Campbell J.A., Lamar W.W.  
1053 The venomous reptiles of the western hemisphere, Vol. II. Ithaca, NY: Comstock Publishing  
1054 Associates. p. 617–633.

1055 Brower a V 1994a. Rapid morphological radiation and convergence among races of the butterfly  
1056 *Heliconius erato* inferred from patterns of mitochondrial DNA evolution. Proc. Natl.  
1057 Acad. Sci. U. S. A. 91:6491–5.

1058 Brower a. V.Z. 1994b. Phylogeny of *Heliconius* butterflies inferred from mitochondrial DNA  
1059 sequences (Lepidoptera: Nymphalidae). Mol. Phylogenet. Evol. 3:159 –174.

1060 Brower a. V.Z., Egan M.G. 1997. Cladistic analysis of *Heliconius* butterflies and relatives  
1061 (Nymphalidae: Heliconiiti): a revised phylogenetic position for *Eueides* based on sequences  
1062 from mtDNA and a nuclear gene. Proc. R. Soc. B Biol. Sci. 264:969–977.

1063 Brower A.V.Z. 1997. The evolution of ecologically important characters in *Heliconius* butterflies  
1064 (Lepidoptera: Nymphalidae): a cladistic review. Zoo. J. Linn. Soc. 119: 457-472.

1065 Brown K., Sheppard P., Turner J. 1974. Quaternary refugia in tropical america: Evidence from race  
1066 formation in *Heliconius* butterflies. Proc. R. Soc. London. Ser. B, Biol. Sci. 187:369–378.

1067 Brown K.S. 1981. The Biology of *Heliconius* and Related Genera. Annu. Rev. Entomol. 26:427–  
1068 457.

1069 Brumfield R.T., Edwards S. V 2007. Evolution into and out of the Andes: a Bayesian analysis of  
1070 historical diversification in *Thamnophilus antshrikes*. Evolution. 61:346–67.

1071 Burbrink, F. T., & Pyron, R. A. (2011). The impact of gene-tree/species-tree discordance on  
1072 diversification-rate estimation. *Evolution; international journal of organic evolution*, 65(7),  
1073 1851–61. doi:10.1111/j.1558-5646.2011.01260.x

1074 Bybee S.M., Yuan F., Ramstetter M.D., Llorente-Bousquets J., Reed R.D., Osorio D., Briscoe A.D.  
1075 2012. UV photoreceptors and UV-yellow wing pigments in *Heliconius* butterflies allow a

1076 color signal to serve both mimicry and intraspecific communication. *Am. Nat.* 179:38–  
1077 51.

1078 Camacho C., Coulouris G., Avagyan V., Ma N., Papadopoulos J., Bealer K., Madden T.L. 2009.  
1079 BLAST+: architecture and applications. *BMC Bioinformatics.* 10:421.

1080 Cardoso M.Z., Gilbert L.E. 2013. Pollen feeding, resource allocation and the evolution of chemical  
1081 defence in passion vine butterflies. *J. Evol. Biol.* 26:1254–60.

1082 Ceccarelli F.S., Crozier R.H. 2007. Dynamics of the evolution of Batesian mimicry: molecular  
1083 phylogenetic analysis of ant-mimicking *Myrmarachne* (Araneae: Salticidae) species and  
1084 their ant models. *J. Evol. Biol.* 20:286–95.

1085 Chauhan R., Jones R., Wilkinson P., Pauchet Y., Ffrench-Constant R.H. 2013. Cytochrome P450-  
1086 encoding genes from the *Heliconius* genome as candidates for cyanogenesis. *Insect Mol. Biol.*  
1087 22:532–40.

1088 CLCBio 2012. CLC Genomics Workbench. [http://www.clcbio.com/products/clc-genomics-](http://www.clcbio.com/products/clc-genomics-workbench/)  
1089 [workbench/](http://www.clcbio.com/products/clc-genomics-workbench/)

1090 CodonCode Corporation 2012. CodonCode. <http://www.codoncode.com/>

1091 Colinvaux, P. A., De Oliveira, P. E., & Bush, M. B. (2000). Amazonian and neotropical plant  
1092 communities on glacial time-scales: The failure of the aridity and refuge hypotheses.  
1093 *Quaternary Science Reviews*, 19(1-5), 141–169.

1094 Constantino L.M., Salazar J.A. 2010. A review of the *Philaethria dido* species complex  
1095 (Lepidoptera: Nymphalidae: Heliconiinae) and description of three new sibling species from  
1096 Colombia. *Zootaxa.* 27:1– 27.

1097 Colinvaux P.A., De Oliveira P.E., Bush M.B. 2000. Amazonian and neotropical plant communities  
1098 on glacial timescales: The failure of the aridity and refuge hypotheses. *Quat. Sci. Rev.*  
1099 19:141–169.

1100 Cuthill J.H., Charleston M. 2012. Phylogenetic codivergence supports coevolution of mimetic  
1101 *Heliconius* butterflies. *PLoS One.* 7:e36464.

1102 Cutter A.D. 2013. Integrating phylogenetics, phylogeography and population genetics through  
1103 genomes and evolutionary theory. *Mol. Phylogenet. Evol.* 69:1172–1185.

1104 Dasmahapatra K.K., Lamas G., Simpson F., Mallet J. 2010. The anatomy of a “suture zone” in  
1105 Amazonian butterflies: a coalescent-based test for vicariant geographic divergence and  
1106 speciation. *Mol. Ecol.* 19:4283–4301.

1107 Day J.J., Peart C.R., Brown K.J., Friel J.P., Bills R., Moritz T. 2013. Continental diversification of  
1108 an African catfish radiation (Mochokidae: Synodontis). *Syst. Biol.* 62:351–65.

1109 Degnan J.H., Rosenberg N. a 2006. Discordance of species trees with their most likely gene trees.  
1110 *PLoS Genet.* 2:e68.

1111 Derryberry E.P., Claramunt S., Derryberry G., Chesser R.T., Cracraft J., Aleixo A., Pérez-Emán J.,  
1112 Remsen J. V., Brumfield R.T. 2011. Lineage diversification and morphological evolution in a  
1113 large-scale continental radiation: the neotropical ovenbirds and woodcreepers (aves:  
1114 Furnariidae). *Evolution.* 65:2973–86.

1115 Drummond A.J., Rambaut A. 2007. BEAST: Bayesian evolutionary analysis by sampling trees.  
1116 *BMC Evol. Biol.* 7:214.

1117 Drummond A.J., Rambaut A., Xie W. 2010. BEAuti. <http://www.beast.bio.ed.ac.uk>

1118 Duenez-Guzman E. a, Mavárez J., Vose M.D., Gavrillets S. 2009. Case studies and mathematical  
1119 models of ecological speciation. 4. Hybrid speciation in butterflies in a jungle. *Evolution.*  
1120 63:2611–26.

1121 Edgar R.C. 2004. MUSCLE: multiple sequence alignment with high accuracy and high throughput.  
1122 *Nucleic Acids Res.* 32:1792–7.

1123 Edwards S. V 2009. Is a new and general theory of molecular systematics emerging? *Evolution.*  
1124 63:1–19.

1125 Edwards S. V, Liu L., Pearl D.K. 2007. High-resolution species trees without concatenation. *Proc.*  
1126 *Natl. Acad. Sci. U.S.A.* 104:5936–41.

1127 Elde N.C., Malik H.S. 2009. The evolutionary conundrum of pathogen mimicry. *Nat. Rev.*

1128 Microbiol. 7:787–97.

1129 Elias M., Gompert Z., Jiggins C., Willmott K. 2008. Mutualistic interactions drive ecological niche  
1130 convergence in a diverse butterfly community. PLoS Biology. 6:2642–9.

1131 Elias M., Gompert Z., Willmott K., Jiggins C. 2009. Phylogenetic community ecology needs to take  
1132 positive interactions into account: Insights from colourful butterflies. Commun. Integr. Biol.  
1133 2:113–6.

1134 Emsley M.G. 1965. Speciation in *Heliconius* (Lep., Nymphalidae): morphology and geographic  
1135 distribution. Zoologica. 50:191–254.

1136 Estrada C., Schulz S., Yildizhan S., Gilbert L.E. 2011. Sexual selection drives the evolution of  
1137 antiaphrodisiac pheromones in butterflies. Evolution (N. Y). Evolution. 65:2843–2854.

1138 Etienne R.S., Haegeman B. 2012. A conceptual and statistical framework for adaptive radiations  
1139 with a key role for diversity dependence. Am. Nat. 180:E75–89.

1140 Etienne R.S., Haegeman B., Stadler T., Aze T., Pearson P.N., Purvis A., Phillimore A.B. 2012.  
1141 Diversity -dependence brings molecular phylogenies closer to agreement with the fossil  
1142 record. Proc. Biol. Sci. 279:1300–9.

1143 Figueiredo, J., Hoorn, C., Van der Ven, P., & Soares, E. (2009). Late Miocene onset of the Amazon  
1144 River and the Amazon deep-sea fan: Evidence from the Foz do Amazonas Basin. *Geology*,  
1145 37(7), 619–622.

1146 Flanagan N.S., Tobler a, Davison a, Pybus O.G., Kapan D.D., Planas S., Linares M., Heckel D.,  
1147 McMillan W.O. 2004. Historical demography of Mullerian mimicry in the neotropical  
1148 *Heliconius* butterflies. Proc. Natl. Acad. Sci. U. S. A. 101:9704–9.

1149 Fordyce J. A. 2010. Host shifts and evolutionary radiations of butterflies. Proc. Biol. Sci. 277:3735–  
1150 43.

1151 Fulton T.L., Strobeck C. 2009. Multiple markers and multiple individuals refine true seal phylogeny  
1152 and bring molecules and morphology back in line. Proc. R. Soc. B Biol. Sci. 277:1065–1070.

1153 Gatesy J., Baker R.H. 2005. Hidden likelihood support in genomic data: can forty-five wrongs

1154        make a right? Syst. Biol. 54:483–92.

1155    Gatesy J., DeSalle R., Wahlberg N. 2007. How many genes should a systematist sample?

1156        Conflicting insights from a phylogenomic matrix characterized by replicated incongruence.

1157        Syst. Biol. 56:355–63.

1158    Gatesy J., Springer M.S. 2013. Concatenation versus coalescence versus “concatalescence”. Proc.

1159        Natl. Acad. Sci. U. S. A. 110:E1179.

1160    Gerard D., Gibbs H.L., Kubatko L. 2011. Estimating hybridization in the presence of coalescence

1161        using phylogenetic intraspecific sampling. BMC Evol. Biol. 11:291.

1162    Gregory-Wodzicki K.M. 2000. Uplift history of the Central and Northern Andes: A review. Geol.

1163        Soc. Am. Bull. 112:1091–1105.

1164    Hall, J. P. W., & Harvey, D. J. (2002). The phylogeography of Amazonia revisited: New evidence

1165        from Riodinid butterflies. *Evolution*, 56(7), 1489–1497.

1166    Heled J., Drummond A.J. 2010. Bayesian inference of species trees from multilocus data. Mol.

1167        Biol. Evol. 27:570–80.

1168    Heliconius Genome Consortium 2012. Butterfly genome reveals promiscuous exchange of

1169        mimicry adaptations among species. Nature. 487:94–98.

1170    Hill, R. I., Gilbert, L. E., & Kronforst, M. R. (2013). Cryptic genetic and wing pattern diversity in a

1171        mimetic Heliconius butterfly. *Molecular ecology*, 22(10), 2760–70.

1172    Hillis D.M., Heath T.A., St. John K. 2005. Analysis and Visualization of Tree Space. Syst. Biol.

1173        54:471 – 482.

1174    Hines H.M., Counterman B.A., Papa R., Albuquerque de Moura P., Cardoso M.Z., Linares M.,

1175        Mallet J., Reed R.D., Jiggins C.D., Kronforst M.R., McMillan W.O. 2011. Wing patterning

1176        gene redefines the mimetic history of Heliconius butterflies. Proc. Natl. Acad. Sci. U. S. A.

1177        108:19666–71.

1178    Hines H.M., Williams P.H. 2012. Mimetic colour pattern evolution in the highly polymorphic

1179        Bombus trifasciatus (Hymenoptera: Apidae) species complex and its comimics. Zool. J. Linn.

1180 Soc. 166:805–826.

1181 Holland B.R., Huber K.T., Dress A., Moulton V. 2002. Delta plots: a tool for analyzing  
1182 phylogenetic distance data. *Mol. Biol. Evol.* 19:2051–9.

1183 Hoorn C., Wesselingh F.P., ter Steege H., Bermudez M.A., Mora A., Sevink J., Sanmartín I.,  
1184 Sanchez-Meseguer A., Anderson C.L., Figueiredo J.P., Jaramillo C., Riff D., Negri F.R.,  
1185 Hooghiemstra H., Lundberg J., Stadler T., Särkinen T., Antonelli A. 2010. Amazonia through  
1186 time: Andean uplift, climate change, landscape evolution, and biodiversity. *Science*. 330:927–  
1187 31.

1188 Janzen D.H., Hallwachs W., Burns J.M. 2010. A tropical horde of counterfeit predator eyes. *Proc.*  
1189 *Natl. Acad. Sci. U. S. A.* 107:11659–65.

1190 Jaramillo, C., Hoorn, C., Silva, S. A. F., Leite, F., Herrera, F., Quiroz, L., Rodolfo, D., et al. (2010).  
1191 The origin of the modern Amazon rainforest: implications of the palynological and  
1192 palaeobotanical record. In C. Hoorn & F. P. Wesselingh (Eds.), *Amazonia, Landscape and*  
1193 *Species Evolution: A Look into the Past* (1st ed., pp. 317–334). Oxford: Blackwell.

1194 Jiggins C.D., Naisbit R.E., Coe R.L., Mallet J. 2001. Reproductive isolation caused by colour  
1195 pattern mimicry. *Nature*. 411:302–5.

1196 Jiggins C.D. 2008. Ecological Speciation in Mimetic Butterflies. *BioScience*. 58:541.

1197 Jiggins C.D., Salazar C., Linares M., Mavarez J. 2008. Review. Hybrid trait speciation and  
1198 *Heliconius* butterflies. *Philos. Trans. R. Soc. Lond. B. Biol. Sci.* 363:3047–54.

1199 Jones R.T., Le Poul Y., Whibley A.C., Mérot C., ffrench-Constant R.H., Joron M. 2013. Wing  
1200 shape variation associated with mimicry in butterflies. *Evolution*. 67:2323–34.

1201 Jones R.T., Salazar P.A., ffrench-Constant R.H., Jiggins C.D., Joron M. 2012. Evolution of a  
1202 mimicry supergene from a multilocus architecture. *Proc. Biol. Sci.* 279:316–25.

1203 Katoh K. 2002. MAFFT: a novel method for rapid multiple sequence alignment based on fast  
1204 Fourier transform. *Nucleic Acids Res.* 30:3059–3066.

1205 Kloepper T.H., Huson D.H. 2008. Drawing explicit phylogenetic networks and their integration into



1206        SplitsTree.        BMC Evol. Biol. 8:22.

1207    Knowles L., Kubatko L. 2010. Estimating species trees. Estimating species trees: practical and

1208        theoretical aspects. Hoboken: John Wiley & Sons. p. 1–15.

1209    Kubatko L., Meng C. 2010. Accomodating hybridisation in a multilocus phylogenetic framework.

1210        Estimating species trees: practical and theoretical aspects. Hoboken: John Wiley & Sons. p.

1211        99–114.

1212    Kunte K., Shea C., Aardema M.L., Scriber J.M., Juenger T.E., Gilbert L.E., Kronforst M.R. 2011.

1213        Sex chromosome mosaicism and hybrid speciation among tiger swallowtail butterflies. PLoS

1214        Genet. 7:e1002274.

1215    Lamas G., Callaghan C., Casagrande M., Mielke O., Pyrcz T., Robbins R., Vilorio A. 2004.

1216        Hesperioidea -- Papilionoidea. In: Heppner J. Atlas of Neotropical Lepidoptera. Checklist:

1217        part 4A. Gainesville, Florida: Association for Tropical Lepidoptera/Scientific Publishers.

1218    Larget B.R., Kotha S.K., Dewey C.N., Ané C. 2010. BUCKy: gene tree/species tree reconciliation

1219        with Bayesian concordance analysis. Bioinformatics. 26:2910–1.

1220    Leaché A.D., Harris R.B., Rannala B., Yang Z. 2014. The Influence of Gene Flow on Species Tree

1221        Estimation: A Simulation Study. Syst. Biol. 63:17-30.

1222    Leaché A.D., Rannala B. 2010. The Accuracy of Species Tree Estimation under Simulation: A

1223        Comparison of Methods. Syst. Biol. 1–12.

1224    Lee C.S., McCool B.A., Moore J.L., Hillis D.M., Gilbert L.E. 1992. Phylogenetic study of

1225        heliconiine butterflies based on morphology and restriction analysis of ribosomal RNA genes.

1226        Zool. J. Linn. Soc. 106:17–31.

1227    Lee J.Y., Joseph L., Edwards S. V 2012. A species tree for the Australo-Papuan Fairy-wrens and

1228        allies (Aves: Maluridae). Syst. Biol. 61:253–71.

1229    Leigh J.W., Susko E., Baumgartner M., Roger A.J. 2008. Testing congruence in phylogenomic

1230        analysis. Syst. Biol. 57:104–15.

1231    Lewis, A. R., Marchant, D. R., Ashworth, A. C., Hemming, S. R., & Machlus, M. L. (2007). Major

- 1232 middle Miocene global climate change: Evidence from East Antarctica and the Transantarctic  
1233 Mountains. *Geological Society of America Bulletin*, 119(11-12), 1449–1461.
- 1234 Linnen C.R., Farrell B.D. 2008. Comparison of methods for species-tree inference in the sawfly  
1235 genus *Neodiprion* (Hymenoptera: Diprionidae). *Syst. Biol.* 57:876–90.
- 1236 Maddison W.P. 1997. Gene Trees in Species Trees. *Syst. Biol.* 46:523–536.
- 1237 Maddison W.P., Knowles L.L. 2006. Inferring phylogeny despite incomplete lineage sorting. *Syst.*  
1238 *Biol.* 55:21–30.
- 1239 Maddison W.P., Maddison D.R. 2011. Mesquite: a modular system for evolutionary analysis.  
1240 <http://www.mesquiteproject.org>
- 1241 Mallet J., Barton N.H. 1989. Strong Natural Selection in a Warning-Color Hybrid Zone. *Evolution*.  
1242 43:421.
- 1243 Mallet J., Beltrán M., Neukirchen W., Linares M. 2007. Natural hybridization in heliconiine  
1244 butterflies: the species boundary as a continuum. *BMC Evol. Biol.* 7:28.
- 1245 Mallet J., Joron M. 1999. Evolution of diversity in warning color and mimicry: polymorphisms,  
1246 shifting balance, and speciation. *Annual Review of Ecology and Systematics*. 30:201–233.
- 1247 Mallet J., McMillan W., Jiggins C. 1998. Mimicry and warning color at the boundary between races  
1248 and species. In: Howard D., Berlocher S. *Endless Forms: Species and Speciation*. New York:  
1249 Oxford Univ. Press. p. 390–403.
- 1250 Martin A., Papa R., Nadeau N.J., Hill R.I., Counterman B.A., Halder G., Jiggins C.D., Kronforst  
1251 M.R., Long A.D., McMillan W.O., Reed R.D. 2012. Diversification of complex butterfly  
1252 wing patterns by repeated regulatory evolution of a Wnt ligand. *Proc. Natl. Acad. Sci. U. S.*  
1253 *A.* 109:12632–7.
- 1254 Martin S.H., Dasmahapatra K.K., Nadeau N.J., Salazar C., Walters J.R., Simpson F., Blaxter M.,  
1255 Manica A., Mallet J., Jiggins C.D. 2013. Genome-wide evidence for speciation with gene  
1256 flow in *Heliconius* butterflies. *Genome Res.* 23:1817-1828.
- 1257 Mavárez J., Salazar C. a, Bermingham E., Salcedo C., Jiggins C.D., Linares M. 2006. Speciation by

1258        hybridization in *Heliconius* butterflies. *Nature*. 441:868–71.

1259    McMillan W.O., Jiggins C.D., Mallet J. 1997. What initiates speciation in passion-vine butterflies?

1260        *Proc. of the Natl. Acad. of Sci. U.S.A.* 94:8628–33.

1261    Mérot C., Mavárez J., Evin A., Dasmahapatra K.K., Mallet J., Lamas G., Joron M. 2013. Genetic

1262        differentiation without mimicry shift in a pair of hybridizing *Heliconius* species (Lepidoptera:

1263        Nymphalidae). *Biol. J. Linn. Soc.* 109:830–847.

1264    Merrill R.M., Naisbit R.E., Mallet J., Jiggins C.D. 2013. Ecological and genetic factors influencing

1265        the transition between host-use strategies in sympatric *Heliconius* butterflies. *J. Evol. Biol.*

1266        26:1959–67.

1267    Merrill R.M., Wallbank R.W.R., Bull V., Salazar P.C.A., Mallet J., Stevens M., Jiggins C.D. 2012.

1268        Disruptive ecological selection on a mating cue. *Proc. Biol. Sci.* 279:4907–13.

1269    Moreira G.R.P., Mielke C.G.C. 2010. A new species of *Neruda* Turner, 1976 from northeast Brazil

1270        (Lepidoptera: Nymphalidae, Heiconiinae, *Heliconiini*). *Nachrichten des Entomol. Vereins*

1271        *Apollo*. 31:85–91.

1272    Müller C.J., Beheregaray L.B. 2010. Palaeo island-affinities revisited--biogeography and

1273        systematics of the Indo-Pacific genus *Cethosia* Fabricius (Lepidoptera: Nymphalidae). *Mol.*

1274        *Phylogenet. Evol.* 57:314–26.

1275    Nadeau N.J., Martin S.H., Kozak K.M., Salazar C., Dasmahapatra K.K., Davey J.W., Baxter S.W.,

1276        Blaxter M.L., Mallet J., Jiggins C.D. 2013. Genome-wide patterns of divergence and gene

1277        flow across a butterfly radiation. *Mol. Ecol.* 22:814–26.

1278    Nylander J.A.A. 2004. MrModelTest. <http://www.abc.se/~nylander/>

1279    Papadopoulou A., Anastasiou I., Vogler A.P. 2010. Revisiting the insect mitochondrial molecular

1280        clock: the mid-Aegean trench calibration. *Mol. Biol. Evol.* 27:1659–72.

1281    Paradis E., Claude J., Strimmer K. 2004. APE: Analyses of Phylogenetics and Evolution in R

1282        language. *Bioinformatics*. 20:289–90.

1283    Pardo-Díaz C., Salazar C., Baxter S.W., Mérot C., Figueiredo-Ready W., Joron M., McMillan

1284 W.O., Jiggins C.D. 2012. Adaptive Introgression across Species Boundaries in *Heliconius*  
1285 Butterflies. *PLoS Genet.* 8:e1002752.

1286 Penney H.D., Hassall C., Skevington J.H., Abbott K.R., Sherratt T.N. 2012. A comparative analysis  
1287 of the evolution of imperfect mimicry. *Nature.* 483:461–4.

1288 Penz C. 1999. Higher level phylogeny for the passion-vine butterflies (Nymphalidae, Heliconiinae)  
1289 based on early stage and adult morphology. *Zool. J. Linn. Soc.* 127:277–344.

1290 Penz C.M., Peggie D. 2003. Phylogenetic relationships among Heliconiinae genera based on  
1291 morphology (Lepidoptera: Nymphalidae). *Syst. Entomol.* 28:451–479.

1292 Pfennig D. 2012. Mimicry: Ecology, evolution, and development. *Curr. Zool.* 58:604–606.

1293 Pigot A.L., Phillimore A.B., Owens I.P.F., Orme C.D.L. 2010. The shape and temporal dynamics of  
1294 phylogenetic trees arising from geographic speciation. *Syst. Biol.* 59:660–73.

1295 Pohl N., Sison-Mangus M.P., Yee E.N., Liswi S.W., Briscoe A.D. 2009. Impact of duplicate gene  
1296 copies on phylogenetic analysis and divergence time estimates in butterflies. *BMC Evol. Biol.*  
1297 9:99.

1298 Posada D., Crandall K.A. 1998. Bioinformatics Applications Note. MODELTEST: testing the  
1299 model of DNA substitution. *Evolution.* 14:817–818.

1300 Przeczek K., Mueller C., Vamosi S.M. 2008. The evolution of aposematism is accompanied by  
1301 increased diversification. *Integrative Zoology.* 3:149–56.

1302 Pybus O.G., Harvey P.H. 2000. Testing macro-evolutionary models using incomplete molecular  
1303 phylogenies. *Proc. Biol. Sci.* 267:2267–72.

1304 Quek S.-P., Counterman B. a, Albuquerque de Moura P., Cardoso M.Z., Marshall C.R., McMillan  
1305 W.O., Kronforst M.R. 2010. Dissecting comimetic radiations in *Heliconius* reveals  
1306 divergent histories of convergent butterflies. *Proc. Natl. Acad. Sci. U. S. A.* 107:7365–70.

1307 R Development Core Team 2008. R: A language and environment for statistical computing.  
1308 <http://www.r-project.org>

1309 Rabosky D.L. 2006. LASER: a maximum likelihood toolkit for detecting temporal shifts in

1310 diversification rates from molecular phylogenies. *Evol. Bioinform. Online.* 2:273–6.

1311 Rabosky D.L., Lovette I.J. 2008. Explosive evolutionary radiations: decreasing speciation or  
1312 increasing extinction through time? *Evolution.* 62:1866–75.

1313 Rambaut A. 2009. FigTree. Tree figure drawing tool. <http://www.tree.bio.ed.ac.uk/software/figtree/>

1314 Rambaut A., Drummond A.J. 2010. LogCombiner. <http://www.beast.bio.ed.ac.uk>

1315 Reid N.M., Hird S.M., Brown J.M., Pelletier T.A., McVay J.D., Satler J.D., Carstens B.C. 2013.  
1316 Poor fit to the multispecies coalescent is widely detectable in empirical data. *Syst. Biol.*  
1317 *syt057.*

1318 Robinson D.F., Foulds L.R. 1981. Comparison of phylogenetic trees. *Math. Biosci.* 53:131–147.

1319 Ronquist F., Huelsenbeck J.P. 2003. MrBayes 3: Bayesian phylogenetic inference under mixed  
1320 models. *Bioinformatics.* 19:1572–1574.

1321 Rosser N., Phillimore A.B., Huertas B., Willmott K.R., Mallet J. 2012. Testing historical  
1322 explanations for gradients in species richness in heliconiine butterflies of tropical America.  
1323 *Biol. J. Linn. Soc.* 105:479–497.

1324 Roure B., Baurain D., Philippe H. 2013. Impact of missing data on phylogenies inferred from  
1325 empirical phylogenomic data sets. *Mol. Biol. Evol.* 30:197–214.

1326 Rull V. 2011. Neotropical biodiversity: timing and potential drivers. *Trends in Ecology &*  
1327 *Evolution.* 26:508–513.

1328 Salazar C., Baxter S.W., Pardo-Díaz C., Wu G., Surridge A., Linares M., Bermingham E., Jiggins  
1329 C.D. 2010. Genetic evidence for hybrid trait speciation in *Heliconius* butterflies. *PLoS Genet.*  
1330 6:e1000930.

1331 Salzberg S.L., Phillippy A.M., Zimin A., Puiu D., Magoc T., Koren S., Treangen T.J., Schatz M.C.,  
1332 Delcher A.L., Roberts M., Marçais G., Pop M., Yorke J. a 2012. GAGE: A critical  
1333 evaluation of genome assemblies and assembly algorithms. *Genome Res.* 22:557–67.

1334 Savage W.K., Mullen S.P. 2009. A single origin of Batesian mimicry among hybridizing  
1335 populations of admiral butterflies (*Limenitis arthemis*) rejects an evolutionary reversion to the

1336        ancestral phenotype. *Proc. Biol. Sci.* 276:2557–65.

1337   Schluter D. 2000. *The Ecology of Adaptive Radiation*. Oxford: Oxford University Press

1338   Sheppard P.M., Turner J.R.G., Brown K.S., Benson W.W., Singer M.C. 1985. Genetics and the

1339        evolution of Müllerian mimicry in *Heliconius* butterflies. *Philos. Trans. R. Soc. B Biol. Sci.*

1340        308:433–610.

1341   Sherratt T.N. 2008. The evolution of Müllerian mimicry. *Naturwissenschaften*. 95:681–95.

1342   Shimodaira H., Hasegawa M. 1989. Letter to the Editor: Multiple comparisons of log-likelihoods

1343        with applications to phylogenetic inference. *DNA Seq.* 1114–1116.

1344   Simpson J.T., Wong K., Jackman S.D., Schein J.E., Jones S.J.M., Birol I. 2009. ABySS: a parallel

1345        assembler for short read sequence data. *Genome Res.* 19:1117–23.

1346   Smith B.T., Harvey M.G., Faircloth B.C., Glenn T.C., Brumfield R.T. 2013. Target capture and

1347        massively parallel sequencing of Ultraconserved Elements for comparative studies at shallow

1348        evolutionary timescales. *Syst. Biol.* syt061.

1349   Solomon S.E., Bacci M., Martins J., Vinha G.G., Mueller U.G. 2008. Paleodistributions and

1350        comparative molecular phylogeography of leafcutter ants (*Atta* spp.) provide new insight into

1351        the origins of Amazonian diversity. *PLoS One*. 3:e2738.

1352   Song S., Liu L., Edwards S. V, Wu S. 2012. Resolving conflict in eutherian mammal phylogeny

1353        using phylogenomics and the multispecies coalescent model. *Proc. Natl. Acad. Sci. U. S. A.*

1354        109:14942–7.

1355   Stadler T. 2011. Mammalian phylogeny reveals recent diversification rate shifts. *Proc. Natl. Acad.*

1356        *Sci. U. S. A.* 108:6187–92.

1357   Stadler T. 2013. Recovering speciation and extinction dynamics based on phylogenies. *J. Evol.*

1358        *Biol.* 26:1203–19.

1359   Stamatakis A. 2006. RAxML-VI-HPC: maximum likelihood-based phylogenetic analyses with

1360        thousands of taxa and mixed models. *Bioinformatics*. 22:2688–90.

1361   Strimmer K., Rambaut A. 2002. Inferring confidence sets of possibly misspecified gene trees. *Proc.*

1362 Biol. Sci. 269:137–42.

1363 Supple M.A., Hines H.M., Dasmahapatra K.K., Lewis J.J., Nielsen D.M., Lavoie C., Ray D.A.,  
1364 Salazar C., McMillan W.O., Counterman B.A. 2013. Genomic architecture of adaptive color  
1365 pattern divergence and convergence in *Heliconius* butterflies. *Genome Res.* 23:1248–57.

1366 Swofford R. 2002. PAUP\*: Phylogenetic Analysis Using Parsimony (\*and other methods).  
1367 <http://www.paup.csit.fsu.edu>

1368 Tamura K., Peterson D., Peterson N., Stecher G., Nei M., Kumar S. 2011. MEGA5: Molecular  
1369 Evolutionary Genetics Analysis using Maximum Likelihood, Evolutionary Distance, and  
1370 Maximum Parsimony Methods. *Mol. Biol. Evol.* 28:2731–2739.

1371 Than C., Ruths D., Nakhleh L. 2008. PhyloNet: a software package for analyzing and  
1372 reconstructing reticulate evolutionary relationships. *BMC Bioinformatics.* 9:322.

1373 Turchetto-Zolet A.C., Pinheiro F., Salgueiro F., Palma-Silva C. 2013. Phylogeographical patterns  
1374 shed light on evolutionary process in South America. *Mol. Ecol.* 22:1193–213.

1375 Turner J. 1965. Evolution of complex polymorphism and mimicry in distasteful South American  
1376 butterflies. *Proc. XII Int. Cong. Entomol. London.* 267.

1377 Turner J.R., Johnson M.S., Eanes W.F. 1979. Contrasted modes of evolution in the same genome:  
1378 allozymes and adaptive change in *Heliconius*. *Proc. Natl. Acad. Sci. U. S. A.* 76:1924–8.

1379 Vamosi S.M. 2005. On the role of enemies in divergence and diversification of prey: a review and  
1380 synthesis. *Can. J. Zoo.* 83:894–910.

1381 Van Velzen R., Wahlberg N., Sosef M.S.M., Bakker F.T. 2013. Effects of changing climate on  
1382 species diversification in tropical forest butterflies of the genus *Cymothoe* (Lepidoptera:  
1383 Nymphalidae). *Biol. J. Linn. Soc.* 108:546–564.

1384 Wahlberg N., Leneveu J., Kodandaramaiah U., Peña C., Nylin S., Freitas A.V.L., Brower A.V.Z.  
1385 2009. Nymphalid butterflies diversify following near demise at the Cretaceous/Tertiary  
1386 boundary. *Proc. Biol. Sci.* 276:4295–302.

1387 Wahlberg N., Wheat C.W. 2008. Genomic outposts serve the phylogenomic pioneers: designing



novel nuclear markers for genomic DNA extractions of lepidoptera. *Syst. Biol.* 57:231–42.

Wertheim, J. O., & Sanderson, M. J. (2011). Estimating diversification rates: how useful are divergence times? *Evolution*. 65(2), 309–20. doi:10.1111/j.1558-5646.2010.01159.x

Wiens J.J., Morrill M.C. 2011. Missing data in phylogenetic analysis: reconciling results from simulations and empirical data. *Syst. Biol.* 60:719–31.

Wilson J.S., Williams K.A., Forister M.L., von Dohlen C.D., Pitts J.P. 2012. Repeated evolution in overlapping mimicry rings among North American velvet ants. *Nat. Commun.* 3:1272.

Wright J.J. 2011. Conservative coevolution of Müllerian mimicry in a group of rift lake catfish. *Evolution*. 65:395–407.

Xia X., Xie Z. 2001. DAMBE: software package for data analysis in molecular biology and evolution. *J. Hered.* 92:371–3.

Yu Y., Than C., Degnan J.H., Nakhleh L. 2011. Coalescent histories on phylogenetic networks and detection of hybridization despite incomplete lineage sorting. *Syst. Biol.* 60:138–49.

Zhang W., Kunte K., Kronforst M.R. 2013. Genome-wide characterization of adaptation and speciation in tiger swallowtail butterflies using de novo transcriptome assemblies. *Genome Biol. Evol.* 5:1233–45.

1414 SUPPLEMENTARY FIGURES

1415

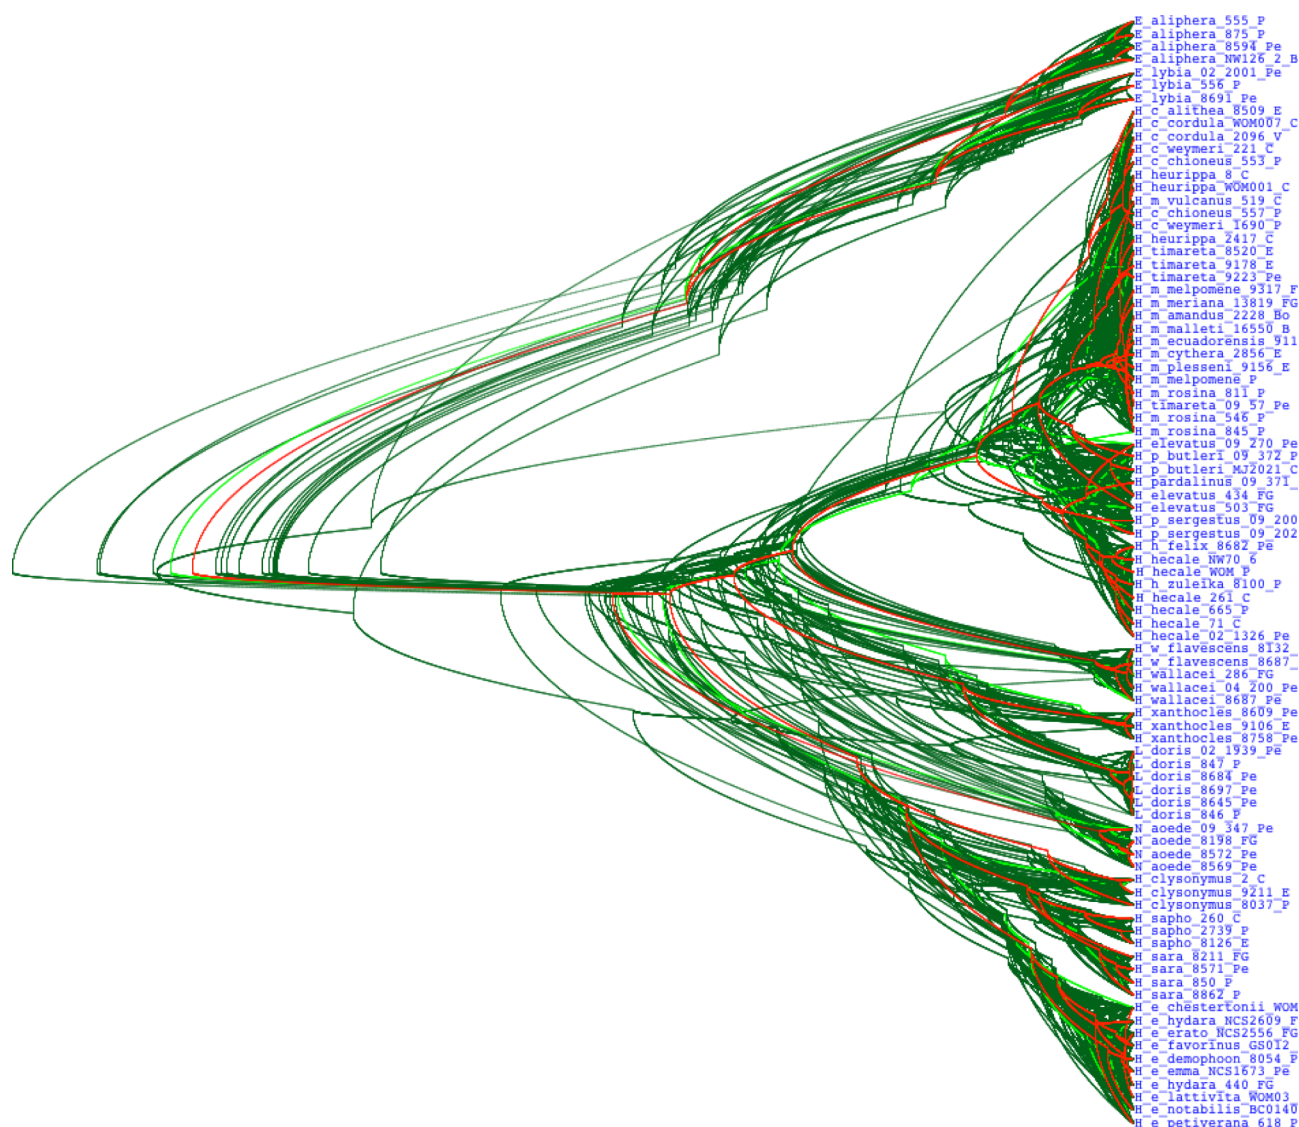

1416

1417 Supplementary Figure S1. Gene tree estimates for well-sampled *Heliconius* species from the Bayesian multispecies

1418 coalescent analysis in \*BEAST. Reticulation reaches the highest levels in the *Heliconius melpomene* clade.

1419

1420

1421

1422

1423

1424

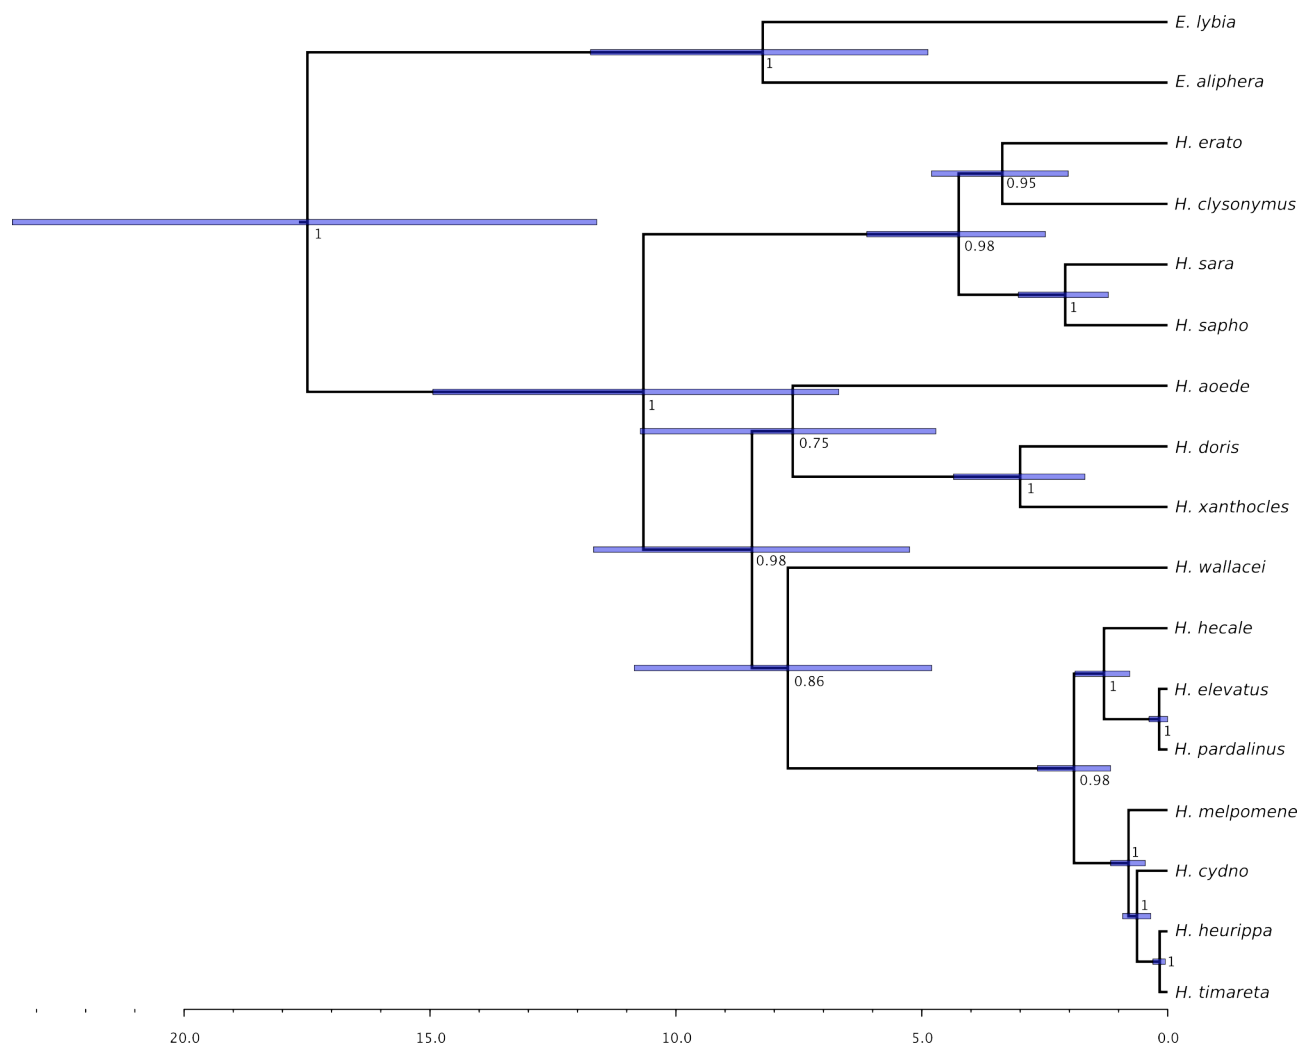

Supplementary Figure S2. Species tree from the \*BEAST analysis. The times of divergence were estimated using a relaxed molecular clock with the prior on the mean age of the root based on a dating of the Nymphalidae radiation (Wahlberg et al. 2009). Node bars show the 95% confidence intervals around the mean age. The scale axis indicates time in Ma.



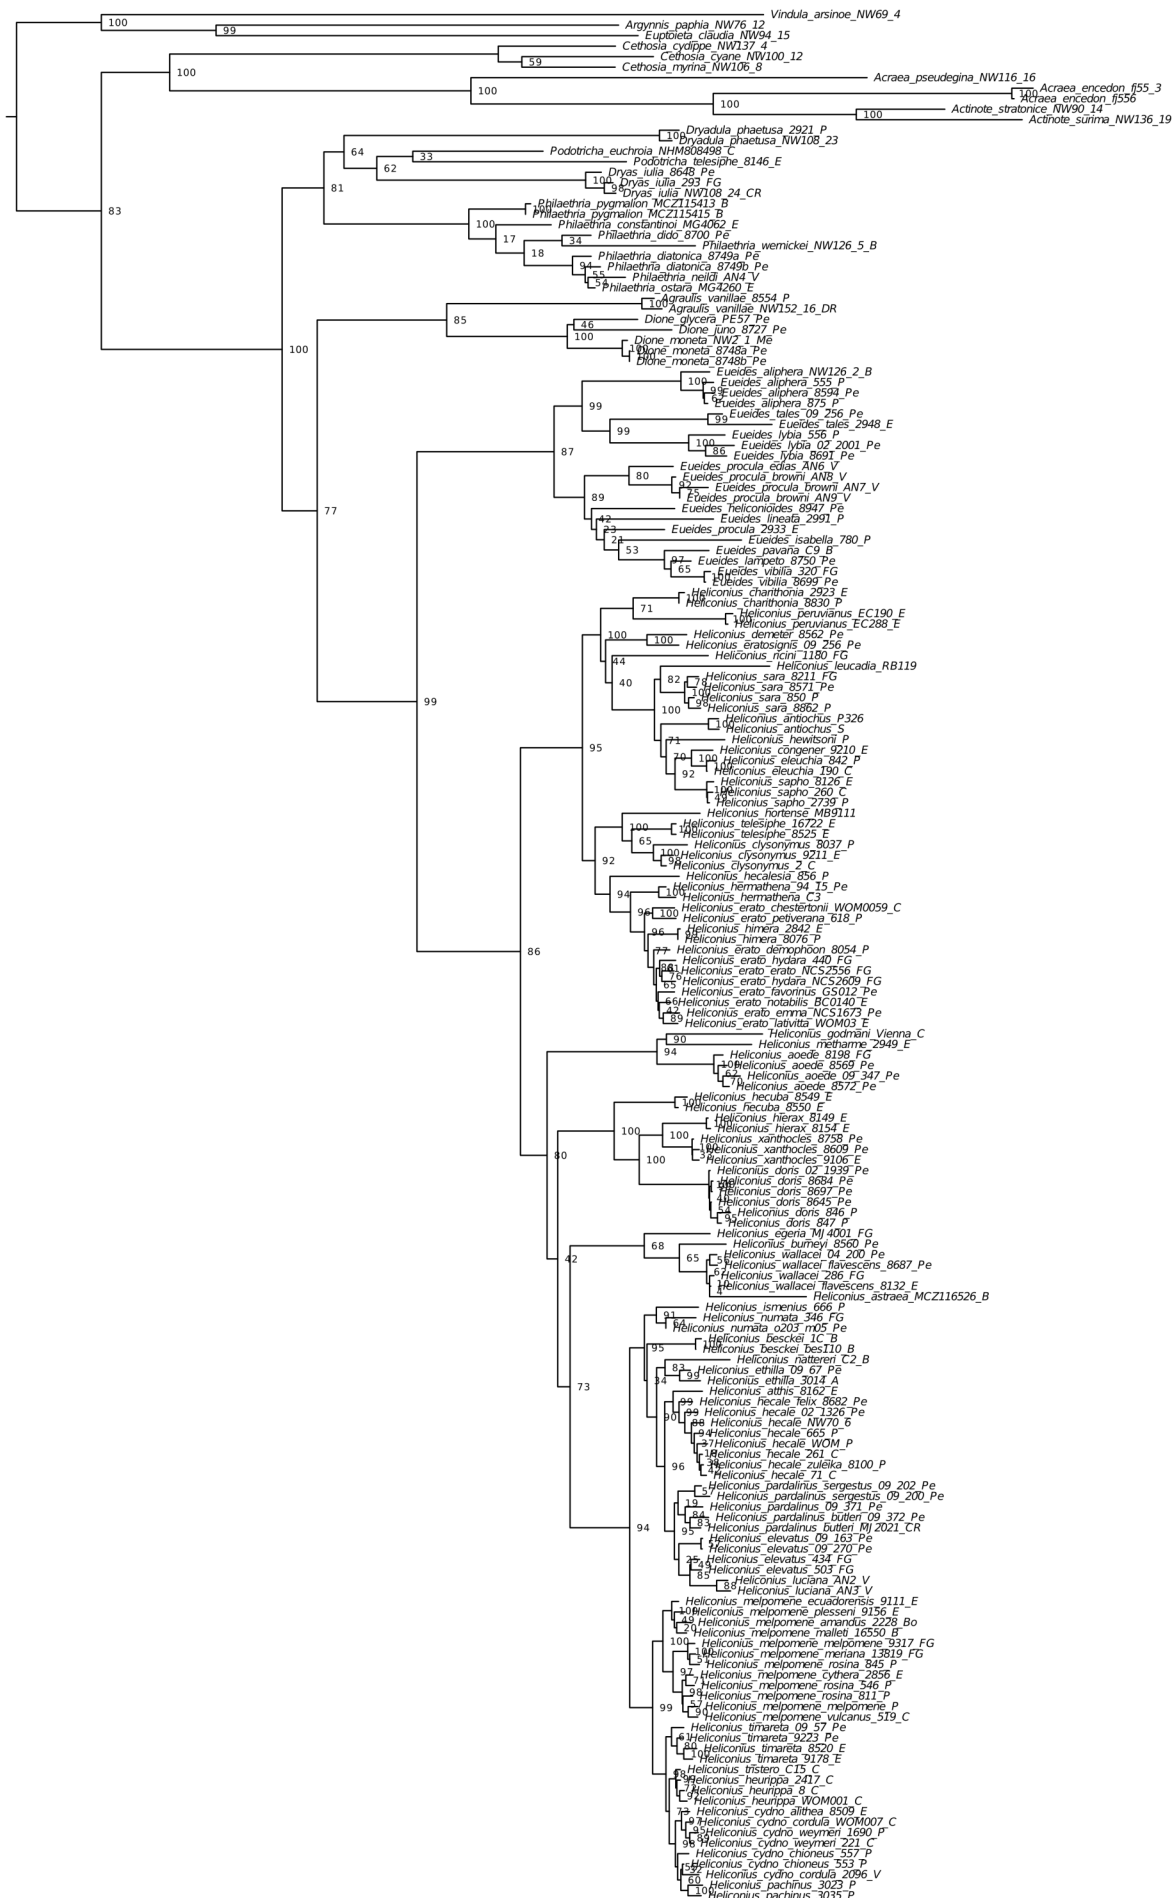

1447 Supplementary Figure S4. Maximum Likelihood (RAxML) phylogeny of Heliconiini butterflies based on two  
1448 mitochondrial and 20 nuclear genes, estimated under the GTR+G model. Support values are estimated based on 1000  
1449 bootstrap replicates. All specimens are included in this analysis. The scale bar is in units of average number of  
1450 substitutions per site.

1451

1452

1453

1454

1455

1456

1457

1458

1459

1460

1461

1462

1463

1464

1465

1466

1467

1468

1469

1470

1471

1472

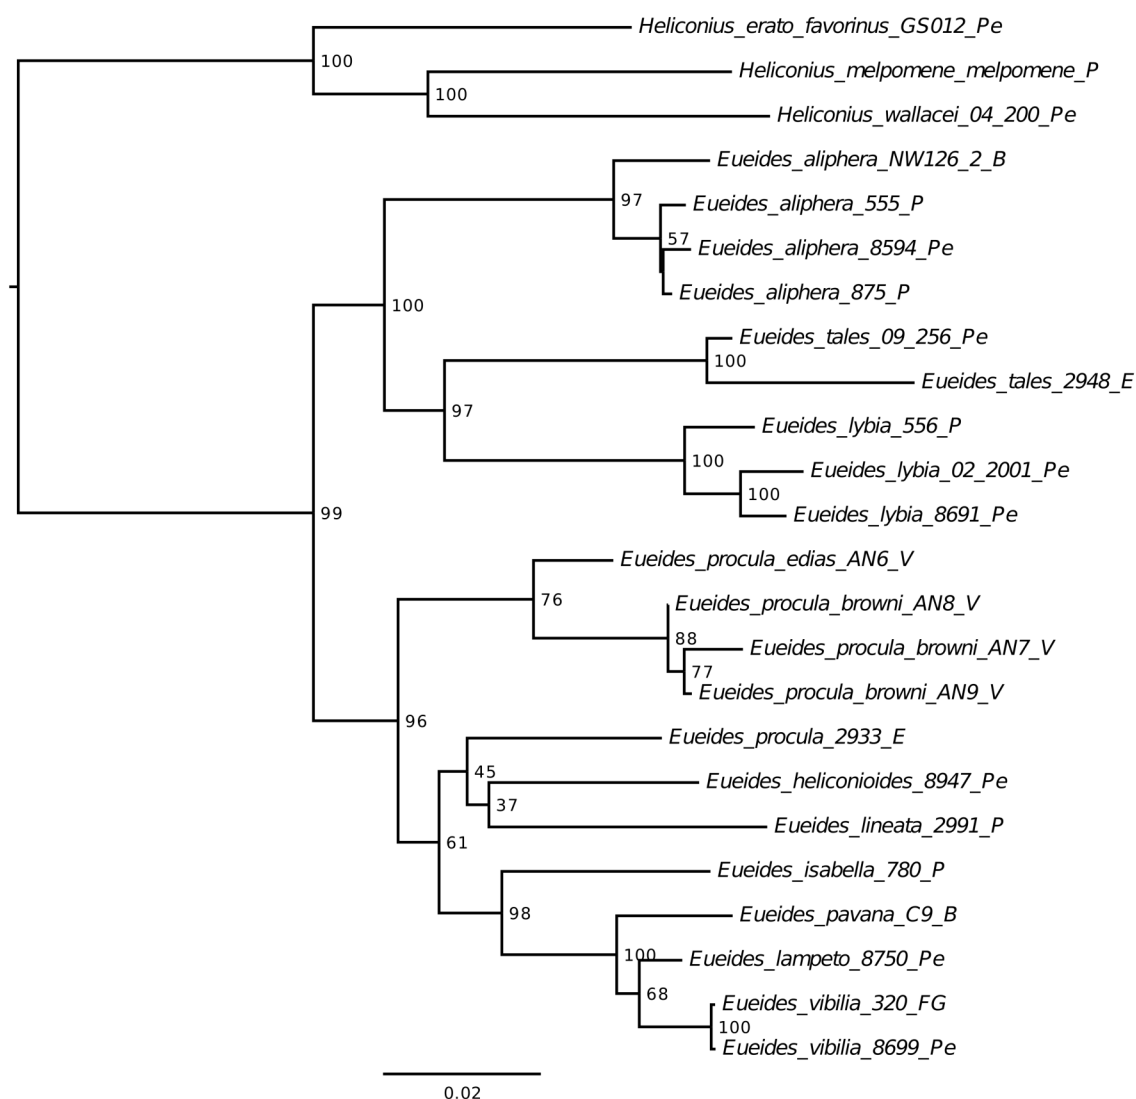

1473

1474 Supplementary Figure S5. Maximum Likelihood (RAxML, GTR+G model) phylogeny of the genus *Eueides* based on  
1475 11 loci sampled in most of the species. Support values based on 1000 bootstrap replicates, scale bar is in units of  
1476 average number of substitutions per site.

1477

1478

1479

1480

1481

1482

1483

1484

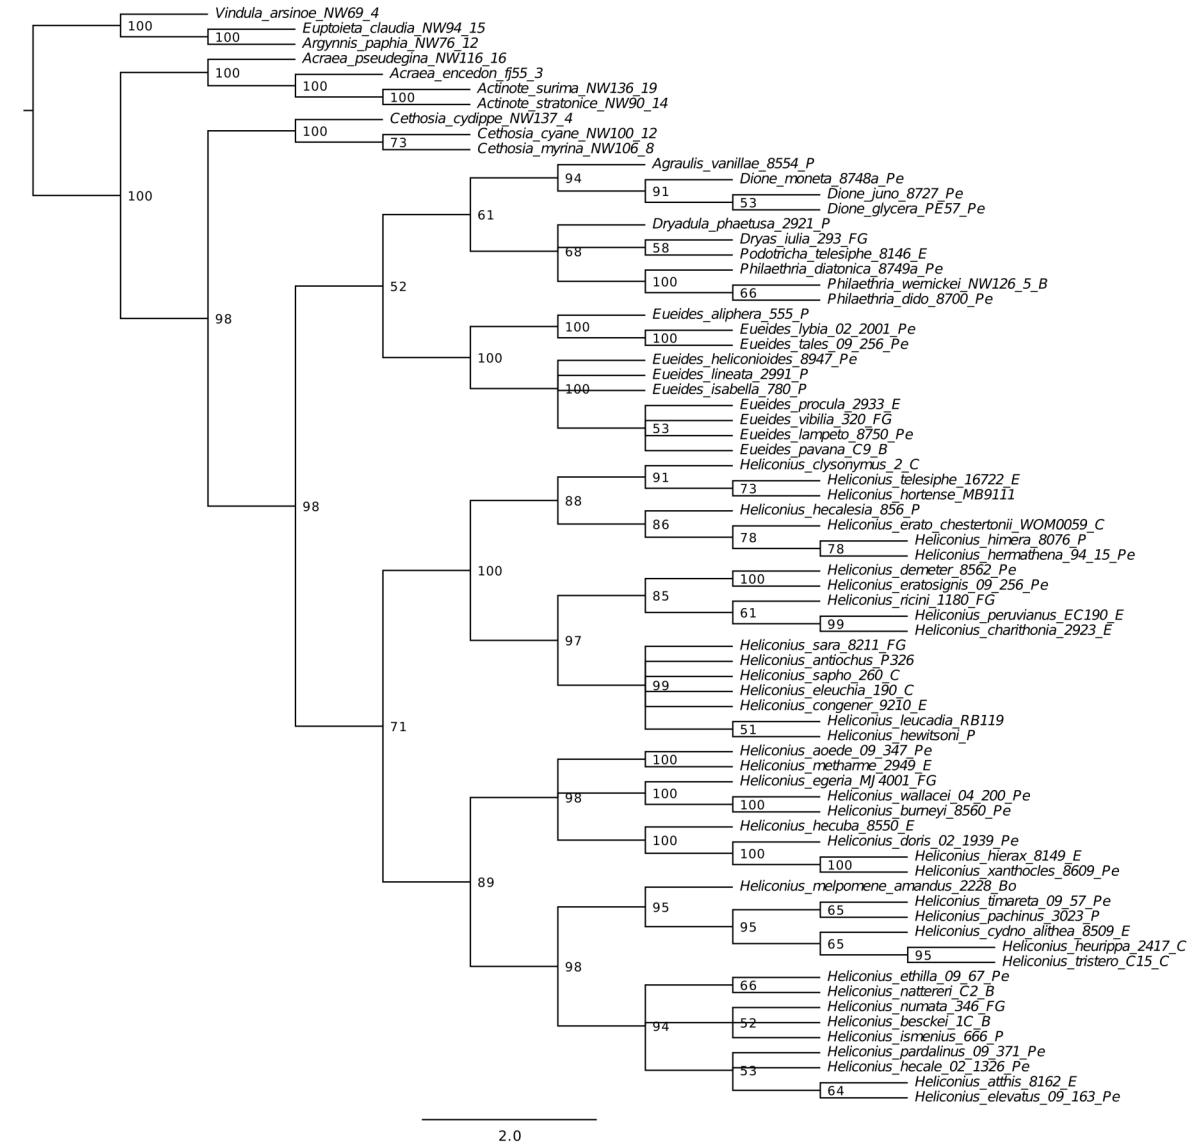

1485

1486 Supplementary Figure S6. Minimise deep coalescences (MDC) phylogeny of Heliconiini: a 50% consensus of 100

1487 bootstrap replicates of the set of 22 Bayesian gene trees.

1488
